# Supplementary material
Source: PubMed Central journal article supplement (PMC6983422)
Supplement: pnas.1914742117.sapp.pdf [file pnas.1914742117.sapp.pdf]

**Supplementary Information for**

**Microglial IRF5-IRF4 Regulatory Axis Regulates Neuroinflammation  
After Cerebral Ischemia and Impacts Stroke Outcomes**

Abdullah Al Mamun<sup>1</sup>, Anjali Chauhan<sup>1</sup>, Shaohua Qi<sup>1</sup>, Conelius Ngwa<sup>1</sup>, Yan Xu<sup>1</sup>,  
Romana Sharmeen<sup>1</sup>, Amy L. Hazen<sup>2</sup>, Jun Li<sup>1</sup>, Jaroslaw A. Aronowski<sup>1</sup>, Louise D.  
McCullough<sup>1</sup>, Fudong Liu<sup>1\*</sup>

<sup>1</sup>Department of Neurology, The University of Texas Health Science Center at  
Houston McGovern Medical School, Houston, TX 77030, USA.

<sup>2</sup>Institute of Molecular Medicine, The University of Texas Health Science Center  
at Houston McGovern Medical School, Houston, TX 77030, USA

\*Corresponding author:

Fudong Liu, MD

E-mail: Fudong.Liu@uth.tmc.edu

**This PDF file includes:**

Supplementary text  
Figures S1 to S5  
SI References  
Sup. Table 1

## **Supplementary Information Text**

### ***Behavioral Assessment***

All behavioral tests were performed by a blinded investigator.

#### Neurological Deficit Scores

3d after reperfusion, neurological deficit scores were assessed by a 4-point scale (1, 2): 0-no deficit; 1-forelimb weakness, torso turning to the ipsilateral side when held by the tail; 2-circling to the affected side; 3-unable to bear weight on affected side and 4-no spontaneous activity or barrel rolling.

#### Corner Test

The mouse entered a corner that was made by moving two card board pieces at an angle of 30 degrees in front of the nose. Contact with the vibrissae led to a rear and the direction in which the mouse turned was recorded. Normal mice do not exhibit a turning preference, but after ischemia, mice have a turning preference to the non-impaired side (right side by our MCAO model). The percentage of right turns was calculated for twenty trials in each sitting. The corner test has been used to detect both sensory and motor abnormalities in the stroke model in young animals (3, 4).

#### Hanging Wire Test

A slight modification was made to the previously used Wire Hand test (5). A wire cage (top dimensions, 18 inch × 9 inch) with its edges taped off was used for this experiment. The mouse was placed on the center of the wire lid and the lid was

slowly inverted and placed on top of the cage. The wire lid was 9 inch above the cage bedding. Latency to fall from the wire was recorded and scored. The time out period was 90 seconds.

**Supplementary Figures:**

**Supplementary figure 1:**

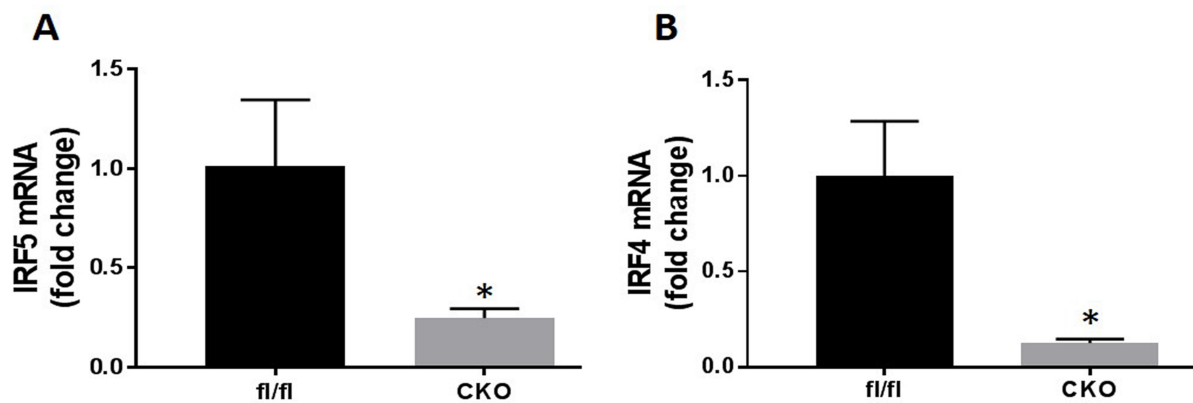

Flow sorted IRF5 or IRF4 CKO microglia had “near null” mRNA level of IRF5 (**A**) or IRF4 (**B**) respectively compared to their flox controls (fl/fl). N=5/group; \* $P < 0.01$  vs. flox control.

Supplementary figure 2:

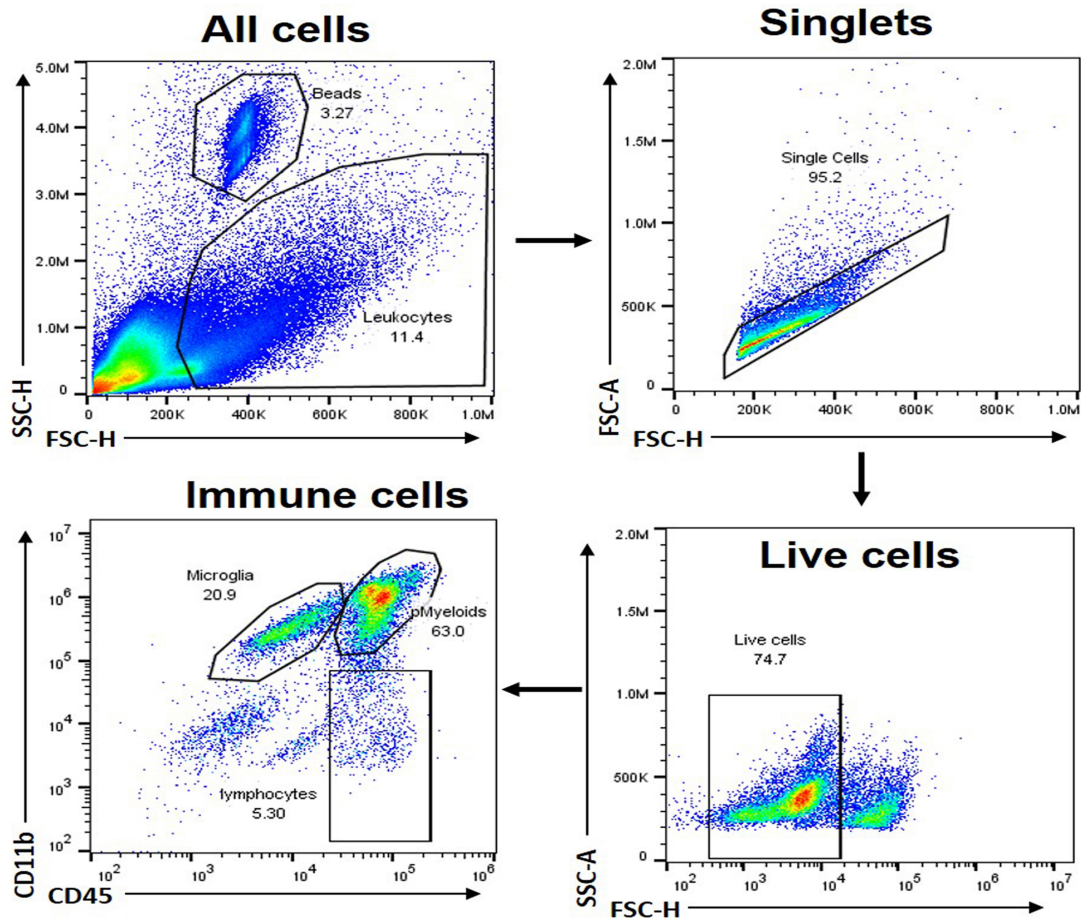

Gating strategy to sequentially separate single cells, live cells, and leukocytes (including microglia).

Supplementary figure 3:

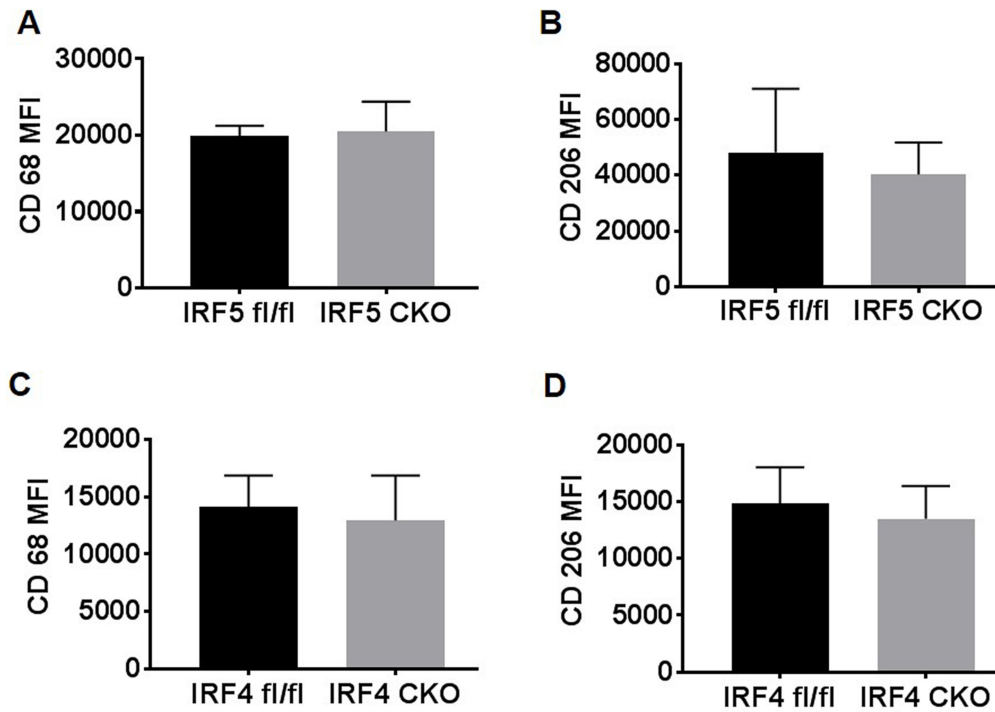

No significant difference was seen in CD68/CD206 expression on infiltrating monocytes between CKO vs. floxed mice for either IRF5 CKO (**A&B**) or IRF4 CKO (**C&D**) strain. N=5 for Lenti-GFP control and 6 for lenti-IRF4 or -IRF5 group.

Supplementary figure 4:

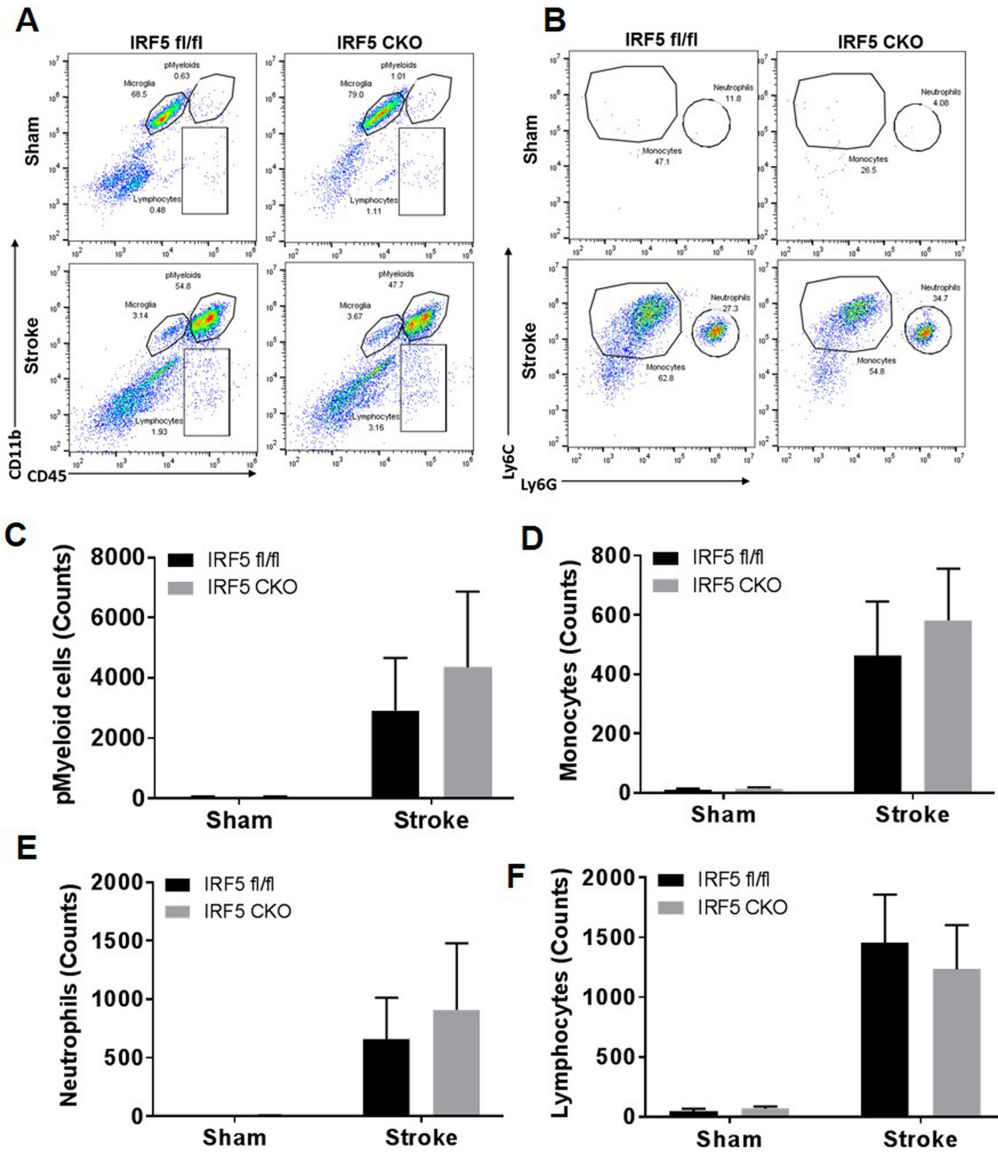

Representative flow plots of gating strategy for immune cell infiltration in IRF5 CKO mice brains after stroke: **(A)** Microglia, pMyeloid cells, and lymphocytes; **(B)** Monocytes and neutrophils. No significant difference was seen in absolute counts of infiltrating pMyeloid cells **(C)**, monocytes **(D)**, neutrophils **(E)** and lymphocytes **(F)** in stroke brains of IRF5 CKO vs. floxed mice. N=5 for Lenti-GFP control and 6 for lenti-IRF4 or -IRF5 group.

Supplementary figure 5:

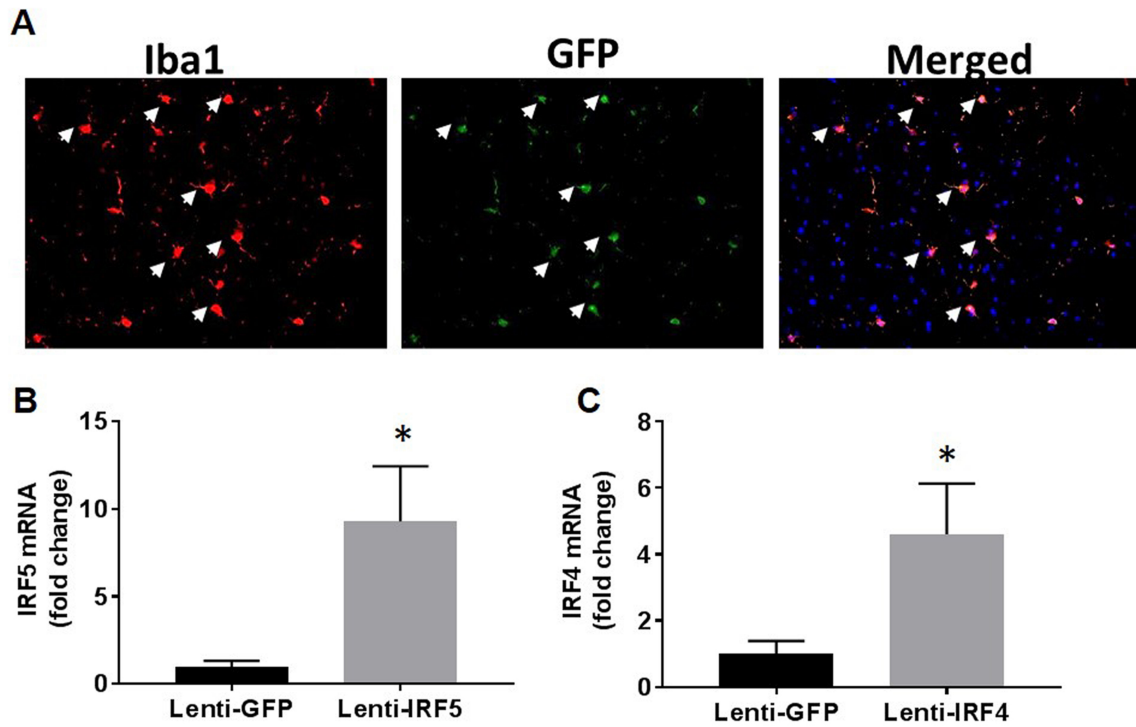

Validation of lentivirus effects on target protein expression. **(A)** IHC staining showed lenti-GFP induced GFP expression in WT microglia 28 days after GFP-lentivirus injection. 40x; scale bar=100 $\mu$ m. Lenti-IRF4 **(B)** and lenti-IRF5 **(C)** injection induced overexpression of IRF4 and IRF5 in flow sorted microglia, evaluated by mRNA level with RT-PCR. Arrows indicate microglia. N=5/group; \* $P$ <0.01 vs. lenti-GFP.

## References

1. Al Mamun A, *et al.* (2018) Interferon regulatory factor 4/5 signaling impacts on microglial activation after ischemic stroke in mice. *Eur J Neurosci* 47(2):140-149.
2. Liu F, Benashski SE, Xu Y, Siegel M, & McCullough LD (2012) Effects of chronic and acute oestrogen replacement therapy in aged animals after experimental stroke. *J Neuroendocrinol* 24(2):319-330.
3. Li X, *et al.* (2004) Chronic behavioral testing after focal ischemia in the mouse: functional recovery and the effects of gender. *Exp Neurol* 187(1):94-104.
4. Manwani B, *et al.* (2011) Functional recovery in aging mice after experimental stroke. *Brain Behav Immun* 25(8):1689-1700.
5. Ji S, *et al.* (2009) Acute neuroprotection by pioglitazone after mild brain ischemia without effect on long-term outcome. *Exp Neurol* 216(2):321-328.



**Table S1. Statistics reporting**

| FIGURE | n                                                                                                                                                                                                                                                                                            | DATA STRUCTURE          | TEST USED                                                    | STATISTICS         | P VALUE                                                                                                                                                                                                                                                            |
|--------|----------------------------------------------------------------------------------------------------------------------------------------------------------------------------------------------------------------------------------------------------------------------------------------------|-------------------------|--------------------------------------------------------------|--------------------|--------------------------------------------------------------------------------------------------------------------------------------------------------------------------------------------------------------------------------------------------------------------|
| 1B     | 21 microglia images (Control, OGD <sup>-</sup> LPS <sup>-</sup> IL <sup>-4</sup> )<br>24 microglia images (OGD <sup>+</sup> LPS <sup>+</sup> IL <sup>-4</sup> )<br>32 microglia images (OGD <sup>+</sup> LPS <sup>-</sup> IL <sup>-4</sup> )<br>Randomly sampled from 3 independent cultures | Non-normal distribution | One-way ANOVA on ranks (Brown-Forsythe test); Tukey post hoc | $F_{(2,74)}=10.61$ | ANOVA $p<0.0001$<br>OGD <sup>-</sup> LPS <sup>-</sup> IL <sup>-4</sup> vs OGD <sup>+</sup> LPS <sup>+</sup> IL <sup>-4</sup> , $p<0.0001$<br>OGD <sup>+</sup> LPS <sup>-</sup> IL <sup>-4</sup> vs OGD <sup>+</sup> LPS <sup>+</sup> IL <sup>-4</sup> , $p<0.0001$ |
| 1C     | Randomly sampled from 3 independent cultures                                                                                                                                                                                                                                                 | Non-normal distribution | One-way ANOVA on ranks (Brown-Forsythe test); Tukey post hoc | $F_{(2,8)}=11.98$  | ANOVA $p<0.0001$<br>OGD <sup>-</sup> LPS <sup>-</sup> IL <sup>-4</sup> vs OGD <sup>+</sup> LPS <sup>+</sup> IL <sup>-4</sup> , $p=0.0064$<br>OGD <sup>+</sup> LPS <sup>-</sup> IL <sup>-4</sup> vs OGD <sup>+</sup> LPS <sup>+</sup> IL <sup>-4</sup> , $p<0.0092$ |
| 1D     | Randomly sampled from 3 independent cultures                                                                                                                                                                                                                                                 | Non-normal distribution | One-way ANOVA on ranks (Brown-Forsythe test); Tukey post hoc | $F_{(2,8)}=1.39$   | ANOVA $p<0.0003$<br>OGD <sup>-</sup> LPS <sup>-</sup> IL <sup>-4</sup> vs OGD <sup>+</sup> LPS <sup>+</sup> IL <sup>-4</sup> , $p=0.0007$<br>OGD <sup>+</sup> LPS <sup>-</sup> IL <sup>-4</sup> vs OGD <sup>+</sup> LPS <sup>+</sup> IL <sup>-4</sup> , $p<0.0005$ |
| 1E     | Randomly sampled from 3 independent cultures                                                                                                                                                                                                                                                 | Non-normal distribution | One-way ANOVA on ranks (Brown-Forsythe test); Tukey post hoc | $F_{(2,8)}=19.28$  | ANOVA $p<0.0009$<br>OGD <sup>-</sup> LPS <sup>-</sup> IL <sup>-4</sup> vs OGD <sup>+</sup> LPS <sup>+</sup> IL <sup>-4</sup> , $p=0.0152$<br>OGD <sup>+</sup> LPS <sup>-</sup> IL <sup>-4</sup> vs OGD <sup>+</sup> LPS <sup>+</sup> IL <sup>-4</sup> , $p<0.0161$ |
| 1F     | Randomly sampled from 3 independent cultures                                                                                                                                                                                                                                                 | Non-normal distribution | One-way ANOVA on ranks (Brown-Forsythe test); Tukey post hoc | $F_{(2,8)}=26.69$  | ANOVA $p<0.0003$<br>OGD <sup>-</sup> LPS <sup>-</sup> IL <sup>-4</sup> vs OGD <sup>+</sup> LPS <sup>+</sup> IL <sup>-4</sup> , $p=0.0009$<br>OGD <sup>+</sup> LPS <sup>-</sup> IL <sup>-4</sup> vs OGD <sup>+</sup> LPS <sup>+</sup> IL <sup>-4</sup> , $p<0.0016$ |
| 1G     | Randomly sampled from 3 independent cultures                                                                                                                                                                                                                                                 | Non-normal distribution | One-way ANOVA on ranks (Brown-Forsythe test); Tukey post hoc | $F_{(2,8)}=0.9046$ | ANOVA $p<0.0002$<br>OGD <sup>-</sup> LPS <sup>-</sup> IL <sup>-4</sup> vs OGD <sup>+</sup> LPS <sup>+</sup> IL <sup>-4</sup> , $p=0.0064$<br>OGD <sup>+</sup> LPS <sup>-</sup> IL <sup>-4</sup> vs OGD <sup>+</sup> LPS <sup>+</sup> IL <sup>-4</sup> , $p<0.0003$ |
| 1H     | Randomly sampled from 3 independent cultures                                                                                                                                                                                                                                                 | Non-normal distribution | One-way ANOVA on ranks (Brown-Forsythe test); Tukey post hoc | $F_{(2,8)}=3.156$  | ANOVA $p<0.0020$<br>OGD <sup>-</sup> LPS <sup>-</sup> IL <sup>-4</sup> vs OGD <sup>+</sup> LPS <sup>+</sup> IL <sup>-4</sup> , $p=0.0051$<br>OGD <sup>+</sup> LPS <sup>-</sup> IL <sup>-4</sup> vs OGD <sup>+</sup> LPS <sup>+</sup> IL <sup>-4</sup> , $p<0.0032$ |
| 1I     | Randomly sampled from 3 independent cultures                                                                                                                                                                                                                                                 | Non-normal distribution | One-way ANOVA on ranks (Brown-Forsythe test); Tukey post hoc | $F_{(2,8)}=11.79$  | ANOVA $p<0.0041$<br>OGD <sup>-</sup> LPS <sup>-</sup> IL <sup>-4</sup> vs OGD <sup>+</sup> LPS <sup>+</sup> IL <sup>-4</sup> , $p=0.0047$<br>OGD <sup>+</sup> LPS <sup>-</sup> IL <sup>-4</sup> vs OGD <sup>+</sup> LPS <sup>+</sup> IL <sup>-4</sup> , $p<0.0028$ |
| 1J     | Randomly sampled from 3 independent cultures                                                                                                                                                                                                                                                 | Non-normal distribution | One-way ANOVA on ranks (Brown-Forsythe test);                | $F_{(2,8)}=0.7144$ | ANOVA $p<0.0001$<br>OGD <sup>-</sup> LPS <sup>-</sup> IL <sup>-4</sup> vs OGD <sup>+</sup> LPS <sup>+</sup> IL <sup>-4</sup> , $p<0.0183$                                                                                                                          |

|    |                                                                                                                                                         |                         |                                                 |                                                                                                                                                                                                                   |                                                                                                                                                                                                                                                                                                                                              |
|----|---------------------------------------------------------------------------------------------------------------------------------------------------------|-------------------------|-------------------------------------------------|-------------------------------------------------------------------------------------------------------------------------------------------------------------------------------------------------------------------|----------------------------------------------------------------------------------------------------------------------------------------------------------------------------------------------------------------------------------------------------------------------------------------------------------------------------------------------|
|    |                                                                                                                                                         |                         | Tukey post hoc                                  |                                                                                                                                                                                                                   | OGD <sup>+</sup> LPS <sup>+</sup> IL-4 <sup>-</sup> vs OGD <sup>+</sup> LPS <sup>+</sup> IL-4 <sup>-</sup> , p=0.0083<br>OGD <sup>+</sup> LPS <sup>+</sup> IL-4 <sup>+</sup> ) vs OGD <sup>+</sup> LPS <sup>+</sup> IL-4 <sup>-</sup> , p<0.0001                                                                                             |
| 2C | 36 microglia images (Scrambled siRNA)<br>42 microglia images (IRF5 SiRNA)<br>48 microglia images (IRF4 SiRNA)<br><br>Sample from 3 independent cultures | Non-normal distribution | Ordinary TWO-way ANOVA; Tukey multiple post hoc | Interaction:<br>F <sub>(1,8)</sub> =8.266, p<0.001<br><br>Row (Scrambled vs siRNA) factor:<br>F <sub>(1,8)</sub> =151.7, p=0.2740<br><br>Column (Normoxia vs OGD) Factor:<br>F <sub>(1,8)</sub> =39.91, p=0.0006  | Normoxia:Scramble siRNA vs. Normoxia:IRF5 siRNA, p=0.0011<br>Normoxia:Scramble siRNA vs. OGD:Scramble siRNA, p<0.0001<br>Normoxia:Scramble siRNA vs. OGD:IRF5 siRNA, p<0.0001<br>Normoxia:IRF5 siRNA vs. OGD:Scramble siRNA, p=0.0169<br>Normoxia:IRF5 siRNA vs. OGD:IRF5 siRNA, p=0.0009                                                    |
| 2D | 36 microglia images (Scrambled siRNA)<br>42 microglia images (IRF5 SiRNA)<br><br>Sampled from 3 independent cultures                                    | Non-normal distribution | Ordinary TWO-way ANOVA; Tukey multiple post hoc | Interaction:<br>F <sub>(1,8)</sub> =150.8, p<0.0001<br><br>Row (Scrambled vs siRNA) factor:<br>F <sub>(1,8)</sub> =164.4, p=0.0010<br><br>Column (Normoxia vs OGD) Factor:<br>F <sub>(1,8)</sub> =164.4, p=0.0005 | Normoxia:Scramble siRNA vs. Normoxia:IRF5 siRNA, p=0.0098<br>Normoxia:Scramble siRNA vs. OGD:Scramble siRNA, p=0.0053<br>Normoxia:Scramble siRNA vs. OGD:IRF5 siRNA, p=0.0004<br>Normoxia:IRF5 siRNA vs. OGD:Scramble siRNA, p=0.9978<br>Normoxia:IRF5 siRNA vs. OGD:IRF5 siRNA, p<0.0001<br>OGD:Scramble siRNA vs. OGD:IRF5 siRNA, p<0.0001 |
| 2E | 36 microglia images (Scrambled siRNA)<br>48 microglia images (IRF4 SiRNA)<br><br>Sampled from 3 independent cultures                                    | Non-normal distribution | Ordinary TWO-way ANOVA; Tukey multiple post hoc | Interaction:<br>F <sub>(1,8)</sub> =164.4, p<0.001<br><br>Row (Scrambled vs siRNA) factor:<br>F <sub>(1,8)</sub> =1.379, p=0.2740<br><br>Column (Normoxia vs OGD) Factor:<br>F <sub>(1,8)</sub> =29.43, p=0.0006  | Normoxia:Scramble siRNA vs. Normoxia:IRF4 siRNA, p=0.0047<br>Normoxia:Scramble siRNA vs. OGD:Scramble siRNA, p=0.0002<br>Normoxia:Scramble siRNA vs. OGD:IRF4 siRNA, p=0.0096<br>Normoxia:IRF4 siRNA vs. OGD:Scramble siRNA, p=0.0974<br>Normoxia:IRF4 siRNA vs. OGD:IRF4 siRNA, p<0.0001<br>OGD:Scramble siRNA vs. OGD:IRF4 siRNA, p<0.0001 |
| 2F | 36 microglia images (Scrambled siRNA)<br>48 microglia images (IRF4 SiRNA)<br><br>Sampled from 3 independent cultures                                    | Non-normal distribution | Ordinary TWO-way ANOVA; Tukey multiple post hoc | Interaction:<br>F <sub>(1,8)</sub> =2.226, p=0.1741<br><br>Row (Scrambled vs siRNA) factor:<br>F <sub>(1,8)</sub> =4.081, p=0.0780<br><br>Column (Normoxia vs OGD) Factor:<br>F <sub>(1,8)</sub> =28.79, p=0.0007 | Normoxia:Scramble siRNA vs. Normoxia:IRF4 siRNA, p=0.0076<br>Normoxia:Scramble siRNA vs. OGD:Scramble siRNA, p=0.2070<br>Normoxia:Scramble siRNA vs. OGD:IRF4 siRNA, p=0.0048<br>Normoxia:IRF4 siRNA vs. OGD:Scramble siRNA, p=0.2441<br>Normoxia:IRF4 siRNA vs. OGD:IRF4 siRNA, 0.9995<br>OGD:Scramble siRNA vs. OGD:IRF4 siRNA, p=0.1435   |

|    |                                     |                         |                                                 |                                                                                                                                                                                                                                                   |                                                                                                                                                                                                                                                                                                                                                                                                                                                                                                                                                                                                                                                                                                                                                                                                                                                               |
|----|-------------------------------------|-------------------------|-------------------------------------------------|---------------------------------------------------------------------------------------------------------------------------------------------------------------------------------------------------------------------------------------------------|---------------------------------------------------------------------------------------------------------------------------------------------------------------------------------------------------------------------------------------------------------------------------------------------------------------------------------------------------------------------------------------------------------------------------------------------------------------------------------------------------------------------------------------------------------------------------------------------------------------------------------------------------------------------------------------------------------------------------------------------------------------------------------------------------------------------------------------------------------------|
| 2G | Sampled from 3 independent cultures | Non-normal distribution | Ordinary TWO-way ANOVA; Tukey multiple post hoc | <p>Interaction:<br/>F<sub>(2,17)</sub>=54.87, p&lt;0.0001</p> <p>Row (Scrambled vs IRF5-siRNA/IRF4-siRNA) factor:<br/>F<sub>(1,17)</sub>=34.03, p&lt;0.0001</p> <p>Column (Normoxia vs OGD) Factor:<br/>F<sub>(2,17)</sub>=73.21, p&lt;0.0001</p> | <p>Normoxia:Scramble siRNA vs. Normoxia:IRF4 siRNA, p=0.4768</p> <p>Normoxia:Scramble siRNA vs. OGD:Scramble siRNA, p=0.9047</p> <p>Normoxia:Scramble siRNA vs. OGD:IRF5 siRNA, p&lt;0.0001</p> <p>Normoxia:Scramble siRNA vs. OGD:IRF4 siRNA, p=0.2024</p> <p>Normoxia:IRF5 siRNA vs. Normoxia:IRF4 siRNA, p=0.5055</p> <p>Normoxia:IRF5 siRNA vs. OGD:Scramble siRNA, p=0.9397</p> <p>Normoxia:IRF5 siRNA vs. OGD:IRF5 siRNA, p&lt;0.0001</p> <p>Normoxia:IRF5 siRNA vs. OGD:IRF4 siRNA, p=0.2030</p> <p>Normoxia:IRF4 siRNA vs. OGD:Scramble siRNA, p=0.9489</p> <p>Normoxia:IRF4 siRNA vs. OGD:IRF5 siRNA, p&lt;0.0001</p> <p>Normoxia:IRF4 siRNA vs. OGD:IRF4 siRNA, p=0.9854</p> <p>OGD:Scramble siRNA vs. OGD:IRF5 siRNA, p&lt;0.0001</p> <p>OGD:Scramble siRNA vs. OGD:IRF4 siRNA, p=0.6592</p> <p>OGD:IRF5 siRNA vs. OGD:IRF4 siRNA, p&lt;0.0001</p> |
| 2H | Sampled from 3 independent cultures | Non-normal distribution | Ordinary TWO-way ANOVA; Tukey multiple post hoc | <p>Interaction:<br/>F<sub>(2,17)</sub>=34.02, p&lt;0.0001</p> <p>Row (Scrambled vs IRF5-siRNA/IRF4-siRNA) factor:<br/>F<sub>(1,17)</sub>=204.7, p&lt;0.0001</p> <p>Column (Normoxia vs OGD) Factor:<br/>F<sub>(2,17)</sub>=33.33, p&lt;0.0001</p> | <p>Normoxia:Scramble siRNA vs. Normoxia:IRF5 siRNA, p&gt;0.9999</p> <p>Normoxia:Scramble siRNA vs. Normoxia:IRF4 siRNA, p=0.9944</p> <p>Normoxia:Scramble siRNA vs. OGD:Scramble siRNA, p=0.0026</p> <p>Normoxia:Scramble siRNA vs. OGD:IRF5 siRNA, p=0.0007</p> <p>Normoxia:Scramble siRNA vs. OGD:IRF4 siRNA, p&lt;0.0001</p> <p>Normoxia:IRF5 siRNA vs. Normoxia:IRF4 siRNA, p=0.9993</p> <p>Normoxia:IRF5 siRNA vs. OGD:Scramble siRNA, p=0.0039</p> <p>Normoxia:IRF5 siRNA vs. OGD:IRF5 siRNA, p=0.0010</p> <p>Normoxia:IRF5 siRNA vs. OGD:IRF4 siRNA, p&lt;0.0001</p> <p>Normoxia:IRF4 siRNA vs. OGD:Scramble siRNA, p=0.0020</p> <p>Normoxia:IRF4 siRNA vs. OGD:IRF5 siRNA, p=0.0005</p>                                                                                                                                                               |

|    |                                                                                                                  |                         |                                                 |                                                                                                                                                                                           |                                                                                                                                                                                                                                                                                                    |
|----|------------------------------------------------------------------------------------------------------------------|-------------------------|-------------------------------------------------|-------------------------------------------------------------------------------------------------------------------------------------------------------------------------------------------|----------------------------------------------------------------------------------------------------------------------------------------------------------------------------------------------------------------------------------------------------------------------------------------------------|
|    |                                                                                                                  |                         |                                                 |                                                                                                                                                                                           | Normoxia:IRF4 siRNA vs. OGD:IRF4 siRNA, p<0.0001<br>OGD:Scramble siRNA vs. OGD:IRF5 siRNA, p=0.9827<br>OGD:Scramble siRNA vs. OGD:IRF4 siRNA, p<0.0001<br>OGD:IRF5 siRNA vs. OGD:IRF4 siRNA, p<0.0001                                                                                              |
| 3B | 4 mice (Sham IRF5 fl/fl)<br>4 mice (Sham IRF5 CKO)<br>6 mice (Stroke IRF5 fl/fl)<br>7 mice (Stroke IRF5 CKO)     | Non-normal distribution | Ordinary TWO-way ANOVA; Tukey multiple post hoc | Interaction: $F_{(1,17)}=22.86$ , p=0.0002<br><br>Row (Sham vs Stroke) factor: $F_{(1,17)}=148.9$ , p<0.0001<br><br>Column (IRF5 fl/fl vs IRF5 CKO) Factor: $F_{(1,17)}=31.96$ , p<0.0001 | Sham:IRF5 fl/fl vs. Sham:IRF5 CKO, p=0.9440<br>Sham:IRF5 fl/fl vs. Stroke:IRF5 fl/fl, p=0.0004<br>Sham:IRF5 fl/fl vs. Stroke:IRF5 CKO, p<0.0001<br>Sham:IRF5 CKO vs. Stroke:IRF5 fl/fl, p=0.0014<br>Sham:IRF5 CKO vs. Stroke:IRF5 CKO, p<0.0001<br>Stroke:IRF5 fl/fl vs. Stroke:IRF5 CKO, p<0.0001 |
| 3C | 4 mice (Sham IRF5 fl/fl)<br>4 mice (Sham IRF5 CKO)<br>6 mice (Stroke IRF5 fl/fl)<br>7 mice (Stroke IRF5 CKO)     | Non-normal distribution | Ordinary TWO-way ANOVA; Tukey multiple post hoc | Interaction: $F_{(1,17)}=25.53$ , p<0.0001<br><br>Row (Sham vs Stroke) factor: $F_{(1,17)}=92.58$ , p<0.0001<br><br>Column (IRF5 fl/fl vs IRF5 CKO) Factor: $F_{(1,17)}=23.46$ , p=0.0002 | Sham:IRF5 fl/fl vs. Sham:IRF5 CKO, p=0.9910<br>Sham:IRF5 fl/fl vs. Stroke:IRF5 fl/fl, p<0.0001<br>Sham:IRF5 fl/fl vs. Stroke:IRF5 CKO, p=0.1530<br>Sham:IRF5 CKO vs. Stroke:IRF5 fl/fl, p<0.0001<br>Sham:IRF5 CKO vs. Stroke:IRF5 CKO, p=0.0208<br>Stroke:IRF5 fl/fl vs. Stroke:IRF5 CKO, p<0.0001 |
| 3E | 4 mice (Sham IRF5 fl/fl)<br>4 mice (Sham IRF5 CKO)<br>6-7 mice (Stroke IRF5 fl/fl)<br>6-7 mice (Stroke IRF5 CKO) | Non-normal distribution | Ordinary TWO-way ANOVA; Tukey multiple post hoc | Interaction: $F_{(1,17)}=33.63$ , p<0.0001<br><br>Row (Sham vs Stroke) factor: $F_{(1,17)}=34.97$ , p<0.0001<br><br>Column (IRF4 fl/fl vs IRF4 CKO) Factor: $F_{(1,17)}=18.5$ , p=0.0005  | Sham:IRF4 fl/fl vs. Sham:IRF4 CKO, p=0.7701<br>Sham:IRF4 fl/fl vs. Stroke:IRF4 fl/fl, p<0.0001<br>Sham:IRF4 fl/fl vs. Stroke:IRF4 CKO, p=0.6801<br>Sham:IRF4 CKO vs. Stroke:IRF4 fl/fl, p<0.0001<br>Sham:IRF4 CKO vs. Stroke:IRF4 CKO, p=0.9998<br>Stroke:IRF4 fl/fl vs. Stroke:IRF4 CKO, p<0.0001 |
| 3F | 4 mice (Sham IRF4 fl/fl)<br>4 mice (Sham IRF4 CKO)<br>6-7 mice (Stroke IRF4 fl/fl)<br>6-7 mice (Stroke IRF4 CKO) | Non-normal distribution | Ordinary TWO-way ANOVA; Tukey multiple post hoc | Interaction: $F_{(1,17)}=14.45$ , p=0.0014<br><br>Row (Sham vs Stroke) factor: $F_{(1,17)}=64.78$ , p<0.0001<br><br>Column (IRF4 fl/fl vs IRF4 CKO) Factor: $F_{(1,17)}=26.36$ , p<0.0001 | Sham:IRF4 fl/fl vs. Sham:IRF4 CKO, p=0.8309<br>Sham:IRF4 fl/fl vs. Stroke:IRF4 fl/fl, p=0.0397<br>Sham:IRF4 fl/fl vs. Stroke:IRF4 CKO, p<0.0001<br>Sham:IRF4 CKO vs. Stroke:IRF4 fl/fl, p=0.2157<br>Sham:IRF4 CKO vs. Stroke:IRF4 CKO, p<0.0001<br>Stroke:IRF4 fl/fl vs. Stroke:IRF4 CKO, p<0.0001 |
| 4B | 4 mice (Sham IRF5 fl/fl)<br>4 mice (Sham IRF5 CKO)<br>11 mice (Stroke IRF5 fl/fl)                                | Non-normal distribution | Ordinary TWO-way ANOVA; Tukey multiple post hoc | Interaction: $F_{(1,24)}=1.092$ , p=0.3065<br><br>Row (Sham vs Stroke) factor: $F_{(1,24)}=48.75$ , p<0.0001                                                                              | Sham:IRF5 fl/fl vs. Sham:IRF5 CKO, p=0.0412<br>Sham:IRF5 fl/fl vs. Stroke:IRF5 fl/fl, p<0.0001<br>Sham:IRF5 fl/fl vs. Stroke:IRF5 CKO, p=0.0461                                                                                                                                                    |

|    |                                                                                                                 |                         |                                                 |                                                                                                                                                                                          |                                                                                                                                                                                                                                                                                                                |
|----|-----------------------------------------------------------------------------------------------------------------|-------------------------|-------------------------------------------------|------------------------------------------------------------------------------------------------------------------------------------------------------------------------------------------|----------------------------------------------------------------------------------------------------------------------------------------------------------------------------------------------------------------------------------------------------------------------------------------------------------------|
|    | 8-9 mice (Stroke IRF5 CKO)                                                                                      |                         |                                                 | Column (IRF5 fl/fl vs IRF5 CKO) Factor: $F_{(1,24)}=8.828$ , $p=0.0066$                                                                                                                  | Sham:IRF5 CKO vs. Stroke:IRF5 fl/fl, $p<0.0001$<br>Sham:IRF5 CKO vs. Stroke:IRF5 CKO, $p=0.0020$<br>Stroke:IRF5 fl/fl vs. Stroke:IRF5 CKO, $p=0.0052$                                                                                                                                                          |
| 4C | 4 mice (Sham IRF5 fl/fl)<br>4 mice (Sham IRF5 CKO)<br>11 mice (Stroke IRF5 fl/fl)<br>8-9 mice (Stroke IRF5 CKO) | Non-normal distribution | Ordinary TWO-way ANOVA; Tukey multiple post hoc | Interaction: $F_{(1,24)}=1.341$ , $p=0.2583$<br>Row (Sham vs Stroke) factor: $F_{(1,24)}=11.53$ , $p=0.0024$<br>Column (IRF5 fl/fl vs IRF5 CKO) Factor: $F_{(1,24)}=10.56$ , $p=0.0034$  | Sham:IRF5 fl/fl vs. Sham:IRF5 CKO, $p=0.0681$<br>Sham:IRF5 fl/fl vs. Stroke:IRF5 fl/fl, $p=0.3944$<br>Sham:IRF5 fl/fl vs. Stroke:IRF5 CKO, $p=0.9996$<br>Sham:IRF5 CKO vs. Stroke:IRF5 fl/fl, $p=0.0004$<br>Sham:IRF5 CKO vs. Stroke:IRF5 CKO, $p=0.0199$<br>Stroke:IRF5 fl/fl vs. Stroke:IRF5 CKO, $p=0.2348$ |
| 4E | 4 mice (Sham IRF5 fl/fl)<br>4 mice (Sham IRF5 CKO)<br>11 mice (Stroke IRF5 fl/fl)<br>8-9 mice (Stroke IRF5 CKO) | Non-normal distribution | Ordinary TWO-way ANOVA; Tukey multiple post hoc | Interaction: $F_{(1,24)}=2.746$ , $p=0.1105$<br>Row (Sham vs Stroke) factor: $F_{(1,24)}=3.973$ , $p=0.0577$<br>Column (IRF5 fl/fl vs IRF5 CKO) Factor: $F_{(1,24)}=0.9833$ , $p=0.3313$ | Sham:IRF5 fl/fl vs. Sham:IRF5 CKO, $p=0.9787$<br>Sham:IRF5 fl/fl vs. Stroke:IRF5 fl/fl, $p=0.9949$<br>Sham:IRF5 fl/fl vs. Stroke:IRF5 CKO, $p=0.1880$<br>Sham:IRF5 CKO vs. Stroke:IRF5 fl/fl, $p=0.8887$<br>Sham:IRF5 CKO vs. Stroke:IRF5 CKO, $p=0.0781$<br>Stroke:IRF5 fl/fl vs. Stroke:IRF5 CKO, $p=0.0909$ |
| 4F | 4 mice (Sham IRF5 fl/fl)<br>4 mice (Sham IRF5 CKO)<br>8 mice (Stroke IRF5 fl/fl)<br>8 mice (Stroke IRF5 CKO)    | Non-normal distribution | Ordinary TWO-way ANOVA; Tukey multiple post hoc | Interaction: $F_{(1,20)}=18.76$ , $p=0.0003$<br>Row (Sham vs Stroke) factor: $F_{(1,20)}=16.07$ , $p=0.0007$<br>Column (IRF5 fl/fl vs IRF5 CKO) Factor: $F_{(1,20)}=8.929$ , $p=0.0073$  | Sham:IRF5 fl/fl vs. Sham:IRF5 CKO, $p=0.8432$<br>Sham:IRF5 fl/fl vs. Stroke:IRF5 fl/fl, $p=0.9957$<br>Sham:IRF5 fl/fl vs. Stroke:IRF5 CKO, $p=0.0004$<br>Sham:IRF5 CKO vs. Stroke:IRF5 fl/fl, $p=0.8871$<br>Sham:IRF5 CKO vs. Stroke:IRF5 CKO, $p<0.0001$<br>Stroke:IRF5 fl/fl vs. Stroke:IRF5 CKO, $p<0.0001$ |
| 4H | 4 mice (Sham IRF4 fl/fl)<br>4 mice (Sham IRF4 CKO)<br>10 mice (Stroke IRF4 fl/fl)<br>8-9 mice (Stroke IRF4 CKO) | Non-normal distribution | Ordinary TWO-way ANOVA; Tukey multiple post hoc | Interaction: $F_{(1,24)}=1.360$ , $p=0.2560$<br>Row (Sham vs Stroke) factor: $F_{(1,24)}=10.47$ , $p=0.0038$<br>Column (IRF4 fl/fl vs IRF4 CKO) Factor: $F_{(1,24)}=7.839$ , $p=0.0104$  | Sham:IRF4 fl/fl vs. Sham:IRF4 CKO, $p=0.0471$<br>Sham:IRF4 fl/fl vs. Stroke:IRF4 fl/fl, $p=0.4216$<br>Sham:IRF4 fl/fl vs. Stroke:IRF4 CKO, $p=0.0010$<br>Sham:IRF4 CKO vs. Stroke:IRF4 fl/fl, $p=0.9908$<br>Sham:IRF4 CKO vs. Stroke:IRF4 CKO, $p=0.0352$<br>Stroke:IRF4 fl/fl vs. Stroke:IRF4 CKO, $p=0.0045$ |
| 4I | 4 mice (Sham IRF4 fl/fl)<br>3 mice (Sham IRF4 CKO)<br>10 mice (Stroke IRF4 fl/fl)                               | Non-normal distribution | Ordinary TWO-way ANOVA; Tukey multiple post hoc | Interaction: $F_{(1,24)}=0.0224$ , $p=0.8821$<br>Row (Sham vs Stroke) factor: $F_{(1,24)}=2.432$ , $p=0.1320$                                                                            | Sham:IRF4 fl/fl vs. Sham:IRF4 CKO, $p=0.036$<br>Sham:IRF4 fl/fl vs. Stroke:IRF4 fl/fl, $p=0.6274$<br>Sham:IRF4 fl/fl vs. Stroke:IRF4 CKO, $p=0.0115$                                                                                                                                                           |

|    |                                                                                                                 |                         |                                                 |                                                                                                                                                                                         |                                                                                                                                                                                                                                                                                                                |
|----|-----------------------------------------------------------------------------------------------------------------|-------------------------|-------------------------------------------------|-----------------------------------------------------------------------------------------------------------------------------------------------------------------------------------------|----------------------------------------------------------------------------------------------------------------------------------------------------------------------------------------------------------------------------------------------------------------------------------------------------------------|
|    | 8-9 mice (Stroke IRF4 CKO)                                                                                      |                         |                                                 | Column (IRF4 fl/fl vs IRF4 CKO) Factor: $F_{(1,24)}=10.67$ , $p=0.0030$                                                                                                                 | Sham:IRF4 CKO vs. Stroke:IRF4 fl/fl, $p=0.6286$<br>Sham:IRF4 CKO vs. Stroke:IRF4 CKO, $p=0.7527$<br>Stroke:IRF4 fl/fl vs. Stroke:IRF4 CKO, $p=0.0356$                                                                                                                                                          |
| 4K | 4 mice (Sham IRF4 fl/fl)<br>4 mice (Sham IRF4 CKO)<br>10 mice (Stroke IRF4 fl/fl)<br>8-9 mice (Stroke IRF4 CKO) | Non-normal distribution | Ordinary TWO-way ANOVA; Tukey multiple post hoc | Interaction: $F_{(1,22)}=6.887$ , $p=0.0155$<br>Row (Sham vs Stroke) factor: $F_{(1,22)}=7.775$ , $p=0.0107$<br>Column (IRF4 fl/fl vs IRF4 CKO) Factor: $F_{(1,22)}=7.210$ , $p=0.0135$ | Sham:IRF4 fl/fl vs. Sham:IRF4 CKO, $p>0.9999$<br>Sham:IRF4 fl/fl vs. Stroke:IRF4 fl/fl, $p=0.0047$<br>Sham:IRF4 fl/fl vs. Stroke:IRF4 CKO, $p=0.9999$<br>Sham:IRF4 CKO vs. Stroke:IRF4 fl/fl, $p=0.0043$<br>Sham:IRF4 CKO vs. Stroke:IRF4 CKO, $p=0.9994$<br>Stroke:IRF4 fl/fl vs. Stroke:IRF4 CKO, $p=0.0005$ |
| 4L | 4 mice (Sham IRF4 fl/fl)<br>4 mice (Sham IRF4 CKO)<br>10 mice (Stroke IRF4 fl/fl)<br>8-9 mice (Stroke IRF4 CKO) | Non-normal distribution | Ordinary TWO-way ANOVA; Tukey multiple post hoc | Interaction: $F_{(1,22)}=2.509$ , $p=0.1274$<br>Row (Sham vs Stroke) factor: $F_{(1,22)}=23.99$ , $p<0.0001$<br>Column (IRF4 fl/fl vs IRF4 CKO) Factor: $F_{(1,22)}=21.50$ , $p=0.0001$ | Sham:IRF4 fl/fl vs. Sham:IRF4 CKO, $p=0.028$<br>Sham:IRF4 fl/fl vs. Stroke:IRF4 fl/fl, $p=0.0008$<br>Sham:IRF4 fl/fl vs. Stroke:IRF4 CKO, $p=0.9977$<br>Sham:IRF4 CKO vs. Stroke:IRF4 fl/fl, $p<0.0001$<br>Sham:IRF4 CKO vs. Stroke:IRF4 CKO, $p=0.1187$<br>Stroke:IRF4 fl/fl vs. Stroke:IRF4 CKO, $p<0.0001$  |
| 5B | 4 mice (Sham IRF4 fl/fl)<br>4 mice (Sham IRF4 CKO)<br>6 mice (Stroke IRF4 fl/fl)<br>6 mice (Stroke IRF4 CKO)    | Non-normal distribution | Ordinary TWO-way ANOVA; Tukey multiple post hoc | Interaction: $F_{(1,18)}=18.2$ , $p=0.0005$<br>Row (Sham vs Stroke) factor: $F_{(1,18)}=45.14$ , $p<0.0001$<br>Column (IRF4 fl/fl vs IRF4 CKO) Factor: $F_{(1,18)}=18.45$ , $p=0.0004$  | Sham:IRF4 fl/fl vs. Sham:IRF4 CKO, $p>0.9999$<br>Sham:IRF4 fl/fl vs. Stroke:IRF4 fl/fl, $p=0.2882$<br>Sham:IRF4 fl/fl vs. Stroke:IRF4 CKO, $p<0.0001$<br>Sham:IRF4 CKO vs. Stroke:IRF4 fl/fl, $p=0.3899$<br>Sham:IRF4 CKO vs. Stroke:IRF4 CKO, $p<0.0001$<br>Stroke:IRF4 fl/fl vs. Stroke:IRF4 CKO, $p<0.0001$ |
| 5C | 4 mice (Sham IRF4 fl/fl)<br>4 mice (Sham IRF4 CKO)<br>6 mice (Stroke IRF4 fl/fl)<br>6 mice (Stroke IRF4 CKO)    | Non-normal distribution | Ordinary TWO-way ANOVA; Tukey multiple post hoc | Interaction: $F_{(1,18)}=17.44$ , $p=0.0006$<br>Row (Sham vs Stroke) factor: $F_{(1,18)}=35.82$ , $p<0.0001$<br>Column (IRF4 fl/fl vs IRF4 CKO) Factor: $F_{(1,18)}=17.47$ , $p=0.0006$ | Sham:IRF4 fl/fl vs. Sham:IRF4 CKO, $p>0.9999$<br>Sham:IRF4 fl/fl vs. Stroke:IRF4 fl/fl, $p=0.5624$<br>Sham:IRF4 fl/fl vs. Stroke:IRF4 CKO, $p<0.0001$<br>Sham:IRF4 CKO vs. Stroke:IRF4 fl/fl, $p=0.6126$<br>Sham:IRF4 CKO vs. Stroke:IRF4 CKO, $p<0.0001$<br>Stroke:IRF4 fl/fl vs. Stroke:IRF4 CKO, $p<0.0001$ |
| 5D | 4 mice (Sham IRF4 fl/fl)<br>4 mice (Sham IRF4 CKO)<br>6 mice (Stroke IRF4 fl/fl)<br>6 mice (Stroke IRF4 CKO)    | Non-normal distribution | Ordinary TWO-way ANOVA; Tukey multiple post hoc | Interaction: $F_{(1,18)}=59.81$ , $p<0.0001$<br>Row (Sham vs Stroke) factor: $F_{(1,18)}=70.71$ , $p<0.0001$                                                                            | Sham:IRF4 fl/fl vs. Sham:IRF4 CKO, $p>0.9999$<br>Sham:IRF4 fl/fl vs. Stroke:IRF4 fl/fl, $p=0.9595$<br>Sham:IRF4 fl/fl vs. Stroke:IRF4 CKO, $p<0.0001$<br>Sham:IRF4 CKO vs. Stroke:IRF4 fl/fl, $p=0.9685$                                                                                                       |

|    |                                                                                                              |                         |                                                 |                                                                                                                                                                                                   |                                                                                                                                                                                                                                                                                                                |
|----|--------------------------------------------------------------------------------------------------------------|-------------------------|-------------------------------------------------|---------------------------------------------------------------------------------------------------------------------------------------------------------------------------------------------------|----------------------------------------------------------------------------------------------------------------------------------------------------------------------------------------------------------------------------------------------------------------------------------------------------------------|
|    |                                                                                                              |                         |                                                 | Column (IRF4 fl/fl vs IRF4 CKO) Factor: $F_{(1,18)}=60.08$ , $p<0.0001$                                                                                                                           | Sham:IRF4 CKO vs. Stroke:IRF4 CKO, $p<0.0001$<br>Stroke:IRF4 fl/fl vs. Stroke:IRF4 CKO, $p<0.0001$                                                                                                                                                                                                             |
| 5E | 4 mice (Sham IRF4 fl/fl)<br>4 mice (Sham IRF4 CKO)<br>6 mice (Stroke IRF4 fl/fl)<br>6 mice (Stroke IRF4 CKO) | Non-normal distribution | Ordinary TWO-way ANOVA; Tukey multiple post hoc | Interaction: $F_{(1,18)}=0.5823$ , $p=0.4565$<br><br>Row (Sham vs Stroke) factor: $F_{(1,18)}=128.3$ , $p<0.0001$<br><br>Column (IRF4 fl/fl vs IRF4 CKO) Factor: $F_{(1,18)}=1.454$ , $p=0.2455$  | Sham:IRF4 fl/fl vs. Sham:IRF4 CKO, $p=0.9915$<br>Sham:IRF4 fl/fl vs. Stroke:IRF4 fl/fl, $p<0.0001$<br>Sham:IRF4 fl/fl vs. Stroke:IRF4 CKO, $p<0.0001$<br>Sham:IRF4 CKO vs. Stroke:IRF4 fl/fl, $p<0.0001$<br>Sham:IRF4 CKO vs. Stroke:IRF4 CKO, $p<0.0001$<br>Stroke:IRF4 fl/fl vs. Stroke:IRF4 CKO, $p=0.4294$ |
| 5F | 5 mice (Sham IRF5 fl/fl)<br>5 mice (Sham IRF5 CKO)<br>6 mice (Stroke IRF5 fl/fl)<br>6 mice (Stroke IRF5 CKO) | Non-normal distribution | Ordinary TWO-way ANOVA; Tukey multiple post hoc | Interaction: $F_{(1,18)}=13.33$ , $p=0.0018$<br><br>Row (Sham vs Stroke) factor: $F_{(1,18)}=54.54$ , $p<0.0001$<br><br>Column (IRF5 fl/fl vs IRF5 CKO) Factor: $F_{(1,18)}=11.05$ , $p=0.0038$   | Sham:IRF5 fl/fl vs. Sham:IRF5 CKO, $p=0.9960$<br>Sham:IRF5 fl/fl vs. Stroke:IRF5 fl/fl, $p<0.0001$<br>Sham:IRF5 fl/fl vs. Stroke:IRF5 CKO, $p=0.0457$<br>Sham:IRF5 CKO vs. Stroke:IRF5 fl/fl, $p<0.0001$<br>Sham:IRF5 CKO vs. Stroke:IRF5 CKO, $p=0.0720$<br>Stroke:IRF5 fl/fl vs. Stroke:IRF5 CKO, $p<0.0001$ |
| 5G | 5 mice (Sham IRF5 fl/fl)<br>5 mice (Sham IRF5 CKO)<br>6 mice (Stroke IRF5 fl/fl)<br>6 mice (Stroke IRF5 CKO) | Non-normal distribution | Ordinary TWO-way ANOVA; Tukey multiple post hoc | Interaction: $F_{(1,18)}=1.189$ , $p=0.2899$<br><br>Row (Sham vs Stroke) factor: $F_{(1,18)}=13.73$ , $p<0.0001$<br><br>Column (IRF5 fl/fl vs IRF5 CKO) Factor: $F_{(1,18)}=1.342$ , $p=0.2618$   | Sham:IRF5 fl/fl vs. Sham:IRF5 CKO, $p>0.9999$<br>Sham:IRF5 fl/fl vs. Stroke:IRF5 fl/fl, $p=0.0008$<br>Sham:IRF5 fl/fl vs. Stroke:IRF5 CKO, $p=0.0252$<br>Sham:IRF5 CKO vs. Stroke:IRF5 fl/fl, $p=0.0008$<br>Sham:IRF5 CKO vs. Stroke:IRF5 CKO, $p=0.0228$<br>Stroke:IRF5 fl/fl vs. Stroke:IRF5 CKO, $p=0.3684$ |
| 5H | 5 mice (Sham IRF5 fl/fl)<br>5 mice (Sham IRF5 CKO)<br>6 mice (Stroke IRF5 fl/fl)<br>6 mice (Stroke IRF5 CKO) | Non-normal distribution | Ordinary TWO-way ANOVA; Tukey multiple post hoc | Interaction: $F_{(1,18)}=0.1190$ , $p=0.7342$<br><br>Row (Sham vs Stroke) factor: $F_{(1,18)}=77.40$ , $p<0.0001$<br><br>Column (IRF5 fl/fl vs IRF5 CKO) Factor: $F_{(1,18)}=0.4526$ , $p=0.5097$ | Sham:IRF5 fl/fl vs. Sham:IRF5 CKO, $p=0.9960$<br>Sham:IRF5 fl/fl vs. Stroke:IRF5 fl/fl, $p<0.0001$<br>Sham:IRF5 fl/fl vs. Stroke:IRF5 CKO, $p=0.0001$<br>Sham:IRF5 CKO vs. Stroke:IRF5 fl/fl, $p<0.0001$<br>Sham:IRF5 CKO vs. Stroke:IRF5 CKO, $p<0.0001$<br>Stroke:IRF5 fl/fl vs. Stroke:IRF5 CKO, $p=0.8735$ |
| 5I | 5 mice (Sham IRF5 fl/fl)<br>5 mice (Sham IRF5 CKO)<br>6 mice (Stroke IRF5 fl/fl)                             | Non-normal distribution | Ordinary TWO-way ANOVA; Tukey multiple post hoc | Interaction: $F_{(1,18)}=34.90$ , $p<0.0001$<br><br>Row (Sham vs Stroke) factor: $F_{(1,18)}=124.5$ , $p<0.0001$                                                                                  | Sham:IRF5 fl/fl vs. Sham:IRF5 CKO, $p<0.0001$<br>Sham:IRF5 fl/fl vs. Stroke:IRF5 fl/fl, $p=0.0290$<br>Sham:IRF5 fl/fl vs. Stroke:IRF5 CKO, $p<0.001$                                                                                                                                                           |

|    |                                                                                                              |                         |                                                 |                                                                                                                                                                                                   |                                                                                                                                                                                                                                                                                                                |
|----|--------------------------------------------------------------------------------------------------------------|-------------------------|-------------------------------------------------|---------------------------------------------------------------------------------------------------------------------------------------------------------------------------------------------------|----------------------------------------------------------------------------------------------------------------------------------------------------------------------------------------------------------------------------------------------------------------------------------------------------------------|
|    | 6 mice (Stroke IRF5 CKO)                                                                                     |                         |                                                 | Column (IRF5 fl/fl vs IRF5 CKO) Factor: $F_{(1,18)}=045.99$ , $p<0.0001$                                                                                                                          | Sham:IRF5 CKO vs. Stroke:IRF5 fl/fl, $p<0.0001$<br>Sham:IRF5 CKO vs. Stroke:IRF5 CKO, $p=0.0079$<br>Stroke:IRF5 fl/fl vs. Stroke:IRF5 CKO, $p<0.0001$                                                                                                                                                          |
| 5J | 5 mice (Sham IRF4 fl/fl)<br>5 mice (Sham IRF4 CKO)<br>6 mice (Stroke IRF4 fl/fl)<br>6 mice (Stroke IRF4 CKO) | Non-normal distribution | Ordinary TWO-way ANOVA; Tukey multiple post hoc | Interaction: $F_{(1,18)}=2.614$ , $p=0.1233$<br><br>Row (Sham vs Stroke) factor: $F_{(1,18)}=122.7$ , $p<0.0001$<br><br>Column (IRF4 fl/fl vs IRF4 CKO) Factor: $F_{(1,18)}=21.43$ , $p=0.0002$   | Sham:IRF4 fl/fl vs. Sham:IRF4 CKO, $p=0.2106$<br>Sham:IRF4 fl/fl vs. Stroke:IRF4 fl/fl, $p<0.0001$<br>Sham:IRF4 fl/fl vs. Stroke:IRF4 CKO, $p<0.0001$<br>Sham:IRF4 CKO vs. Stroke:IRF4 fl/fl, $p=0.0013$<br>Sham:IRF4 CKO vs. Stroke:IRF4 CKO, $p<0.0001$<br>Stroke:IRF4 fl/fl vs. Stroke:IRF4 CKO, $p=0.0011$ |
| 5K | 5 mice (Sham IRF4 fl/fl)<br>5 mice (Sham IRF4 CKO)<br>6 mice (Stroke IRF4 fl/fl)<br>6 mice (Stroke IRF4 CKO) | Non-normal distribution | Ordinary TWO-way ANOVA; Tukey multiple post hoc | Interaction: $F_{(1,18)}=0.0737$ , $p=0.7890$<br><br>Row (Sham vs Stroke) factor: $F_{(1,18)}=1.333$ , $p=0.2633$<br><br>Column (IRF4 fl/fl vs IRF4 CKO) Factor: $F_{(1,18)}=0.0547$ , $p=0.8176$ | Sham:IRF4 fl/fl vs. Sham:IRF4 CKO, $p>0.9999$<br>Sham:IRF4 fl/fl vs. Stroke:IRF4 fl/fl, $p=0.9229$<br>Sham:IRF4 fl/fl vs. Stroke:IRF4 CKO, $p=0.7613$<br>Sham:IRF4 CKO vs. Stroke:IRF4 fl/fl, $p=0.9138$<br>Sham:IRF4 CKO vs. Stroke:IRF4 CKO, $p=0.7465$<br>Stroke:IRF4 fl/fl vs. Stroke:IRF4 CKO, $p=0.7465$ |
| 5L | 5 mice (Sham IRF4 fl/fl)<br>5 mice (Sham IRF4 CKO)<br>6 mice (Stroke IRF4 fl/fl)<br>6 mice (Stroke IRF4 CKO) | Non-normal distribution | Ordinary TWO-way ANOVA; Tukey multiple post hoc | Interaction: $F_{(1,18)}=8.6660$ , $p=0.0087$<br><br>Row (Sham vs Stroke) factor: $F_{(1,18)}=22.85$ , $p=0.0001$<br><br>Column (IRF4 fl/fl vs IRF4 CKO) Factor: $F_{(1,18)}=9.3310$ , $p=0.0068$ | Sham:IRF4 fl/fl vs. Sham:IRF4 CKO, $p=0.9998$<br>Sham:IRF4 fl/fl vs. Stroke:IRF4 fl/fl, $p=0.5757$<br>Sham:IRF4 fl/fl vs. Stroke:IRF4 CKO, $p=0.0002$<br>Sham:IRF4 CKO vs. Stroke:IRF4 fl/fl, $p=0.6227$<br>Sham:IRF4 CKO vs. Stroke:IRF4 CKO, $p=0.0002$<br>Stroke:IRF4 fl/fl vs. Stroke:IRF4 CKO, $p=0.0016$ |
| 5M | 5 mice (Sham IRF4 fl/fl)<br>5 mice (Sham IRF4 CKO)<br>6 mice (Stroke IRF4 fl/fl)<br>6 mice (Stroke IRF4 CKO) | Non-normal distribution | Ordinary TWO-way ANOVA; Tukey multiple post hoc | Interaction: $F_{(1,18)}=5.83$ , $p=0.0266$<br><br>Row (Sham vs Stroke) factor: $F_{(1,18)}=26.73$ , $p<0.0001$<br><br>Column (IRF4 fl/fl vs IRF4 CKO) Factor: $F_{(1,18)}=3.515$ , $p=0.0771$    | Sham:IRF4 fl/fl vs. Sham:IRF4 CKO, $p=0.9828$<br>Sham:IRF4 fl/fl vs. Stroke:IRF4 fl/fl, $p=0.2437$<br>Sham:IRF4 fl/fl vs. Stroke:IRF4 CKO, $p=0.0005$<br>Sham:IRF4 CKO vs. Stroke:IRF4 fl/fl, $p=0.1218$<br>Sham:IRF4 CKO vs. Stroke:IRF4 CKO, $p=0.0002$<br>Stroke:IRF4 fl/fl vs. Stroke:IRF4 CKO, $p=0.0243$ |
| 6A | 7 mice (Stroke IRF5 fl/fl)                                                                                   | Non-normal distribution | t test (two-tailed)                             | $t_{(11)}=4.203$ (Cortex)<br>$t_{(11)}=3.800$ (Striatum)                                                                                                                                          | fl/fl vs CKO, $p=0.0018$ (Cortex)                                                                                                                                                                                                                                                                              |



|    |                                                          |                         |                     |                                                                                              |                                                                                                                            |
|----|----------------------------------------------------------|-------------------------|---------------------|----------------------------------------------------------------------------------------------|----------------------------------------------------------------------------------------------------------------------------|
|    | 6 mice (Stroke IRF5 CKO)                                 |                         |                     | $t_{(11)}=5.279$<br>(Hemisphere)                                                             | fl/fl vs CKO, $p=0.0035$<br>(Striatum)<br>fl/fl vs CKO, $p=0.0004$<br>(Hemisphere)                                         |
| 6B | 6 mice (Stroke IRF5 fl/fl)<br>6 mice (Stroke IRF5 CKO)   | Non-normal distribution | t test (two-tailed) | $t_{(10)}=1.545$ (30 days)                                                                   | fl/fl vs CKO, $p=0.1765$ (30 days)                                                                                         |
| 6C | 6 mice (Stroke IRF5 fl/fl)<br>6 mice (Stroke IRF5 CKO)   | Non-normal distribution | t test (two-tailed) | $t_{(10)}=4.595$ (3 days)<br>$t_{(10)}=0.5044$ (30 days)                                     | fl/fl vs CKO, $p=0.0010$ (3 days)<br>fl/fl vs CKO, $p=0.6249$ (30 days)                                                    |
| 6D | 6 mice (Stroke IRF5 fl/fl)<br>6 mice (Stroke IRF5 CKO)   | Non-normal distribution | t test (two-tailed) | $t_{(10)}=5.571$ (3 days)<br>$t_{(10)}=1.313$ (30 days)                                      | fl/fl vs CKO, $p=0.0002$ (3 days)<br>fl/fl vs CKO, $p=0.2159$ (30 days)                                                    |
| 6E | 6 mice (Stroke IRF5 fl/fl)<br>6 mice (Stroke IRF5 CKO)   | Non-normal distribution | t test (two-tailed) | $t_{(10)}=1.2050$ (3 days)<br>$t_{(10)}=2.8600$ (30 days)                                    | fl/fl vs CKO, $p=0.2560$ (3 days)<br>fl/fl vs CKO, $p=0.0169$ (30 days)                                                    |
| 6F | 6 mice (Stroke IRF5 fl/fl)<br>6 mice (Stroke IRF5 CKO)   | Non-normal distribution | t test (two-tailed) | $t_{(10)}=1.7090$ (3 days)<br>$t_{(10)}=2.431$ (30 days)                                     | fl/fl vs CKO, $p=0.1182$ (3 days)<br>fl/fl vs CKO, $p=0.0354$ (30 days)                                                    |
| 6G | 6 mice (Stroke IRF5 fl/fl)<br>6 mice (Stroke IRF5 CKO)   | Non-normal distribution | t test (two-tailed) | $t_{(10)}=1.946$ (30 days)                                                                   | fl/fl vs CKO, $p=0.0779$ (30 days)                                                                                         |
| 6H | 6 mice (Stroke IRF5 fl/fl)<br>6 mice (Stroke IRF5 CKO)   | Non-normal distribution | t test (two-tailed) | $t_{(10)}=1.4220$ (30 days)                                                                  | fl/fl vs CKO, $p=0.1855$ (30 days)                                                                                         |
| 6I | 6-7 mice (Stroke IRF5 fl/fl)<br>6 mice (Stroke IRF5 CKO) | Non-normal distribution | t test (two-tailed) | $t_{(11)}=1.015$ (Cortex)<br>$t_{(11)}=3.338$ (Striatum)<br>$t_{(11)}=1.507$<br>(Hemisphere) | fl/fl vs CKO, $p=0.3318$<br>(Cortex)<br>fl/fl vs CKO, $p=0.0066$<br>(Striatum)<br>fl/fl vs CKO, $p=0.1660$<br>(Hemisphere) |
| 6J | 6 mice (Stroke IRF4 fl/fl)<br>6 mice (Stroke IRF4 CKO)   | Non-normal distribution | t test (two-tailed) | $t_{(10)}=3.763$ (30 days)                                                                   | fl/fl vs CKO, $p=0.0037$ (30 days)                                                                                         |
| 6K | 6-7 mice (Stroke IRF4 fl/fl)<br>6 mice (Stroke IRF4 CKO) | Non-normal distribution | t test (two-tailed) | $t_{(10)}=2.863$ (3 days)<br>$t_{(10)}=0.542$ (30 days)                                      | fl/fl vs CKO, $p=0.0143$ (3 days)<br>fl/fl vs CKO, $p=0.5995$ (30 days)                                                    |
| 6L | 6-7 mice (Stroke IRF4 fl/fl)<br>6 mice (Stroke IRF4 CKO) | Non-normal distribution | t test (two-tailed) | $t_{(10)}=3.087$ (3 days)<br>$t_{(10)}=4.065$ (30 days)                                      | fl/fl vs CKO, $p=0.0103$ (3 days)<br>fl/fl vs CKO, $p=0.0019$ (30 days)                                                    |
| 6M | 6-7 mice (Stroke IRF4 fl/fl)<br>6 mice (Stroke IRF4 CKO) | Non-normal distribution | t test (two-tailed) | $t_{(10)}=2.370$ (3 days)<br>$t_{(10)}=4.065$ (30 days)                                      | fl/fl vs CKO, $p=0.0393$ (3 days)<br>fl/fl vs CKO, $p=0.0005$ (30 days)                                                    |
| 6N | 6-7 mice (Stroke IRF4 fl/fl)<br>6 mice (Stroke IRF4 CKO) | Non-normal distribution | t test (two-tailed) | $t_{(10)}=2.477$ (3 days)<br>$t_{(10)}=8.437$ (30 days)                                      | fl/fl vs CKO, $p=0.0307$ (3 days)<br>fl/fl vs CKO, $p<0.0001$ (30 days)                                                    |
| 6O | 6 mice (Stroke IRF4 fl/fl)                               | Non-normal distribution | t test (two-tailed) | $t_{(10)}=0.238$ (30 days)                                                                   | fl/fl vs CKO, $p=0.8161$ (30 days)                                                                                         |

|    |                                                                                                                                                                          |                         |                                                 |                                                                                                                                                                                                                         |                                                                                                                                                                                                                                                                                                                                                                                                                                                                                                                                                                                                                                                                                                                                                                                                               |
|----|--------------------------------------------------------------------------------------------------------------------------------------------------------------------------|-------------------------|-------------------------------------------------|-------------------------------------------------------------------------------------------------------------------------------------------------------------------------------------------------------------------------|---------------------------------------------------------------------------------------------------------------------------------------------------------------------------------------------------------------------------------------------------------------------------------------------------------------------------------------------------------------------------------------------------------------------------------------------------------------------------------------------------------------------------------------------------------------------------------------------------------------------------------------------------------------------------------------------------------------------------------------------------------------------------------------------------------------|
|    | 6 mice (Stroke IRF4 CKO)                                                                                                                                                 |                         |                                                 |                                                                                                                                                                                                                         |                                                                                                                                                                                                                                                                                                                                                                                                                                                                                                                                                                                                                                                                                                                                                                                                               |
| 6P | 6 mice (Stroke IRF4 fl/fl)<br>6 mice (Stroke IRF4 CKO)                                                                                                                   | Non-normal distribution | t test (two-tailed)                             | $t_{(10)}=3.507$ (30 days)                                                                                                                                                                                              | fl/fl vs CKO, $p=0.0057$ (30 days)                                                                                                                                                                                                                                                                                                                                                                                                                                                                                                                                                                                                                                                                                                                                                                            |
| 7B | 4 mice (Sham Lenti-IRF4)<br>4 mice (Sham Lenti-GFP)<br>4 mice (Sham Lenti-IRF5)<br>7 mice (Stroke Lenti-IRF4)<br>5 mice (Stroke Lenti-GFP)<br>6 mice (Stroke Lenti-IRF5) | Non-normal distribution | Ordinary TWO-way ANOVA; Tukey multiple post hoc | Interaction:<br>$F_{(1,24)}=0.025$ , $p=0.9725$<br><br>Row (Lenti-GFP vs Lenti-IRF5 vs Lenti-IRF4) factor:<br>$F_{(1,24)}=6.298$ , $p=0.0063$<br><br>Column (Sham vs Stroke) Factor:<br>$F_{(1,24)}=20.82$ , $p=0.0001$ | Lenti-IRF4:Sham vs. Lenti-IRF4:Stroke, $p=0.1434$<br>Lenti-IRF4:Sham vs. Lenti-GFP:Sham, $p=0.9583$<br>Lenti-IRF4:Sham vs. Lenti-GFP:Stroke, $p=0.0250$<br>Lenti-IRF4:Sham vs. Lenti-IRF5:Sham, $p=0.3182$<br>Lenti-IRF4:Sham vs. Lenti-IRF5:Stroke, $p=0.0004$<br>Lenti-IRF4:Stroke vs. Lenti-GFP:Sham, $p=0.5865$<br>Lenti-IRF4:Stroke vs. Lenti-GFP:Stroke, $p=0.8561$<br>Lenti-IRF4:Stroke vs. Lenti-IRF5:Sham, $p>0.9999$<br>Lenti-IRF4:Stroke vs. Lenti-IRF5:Stroke, $p=0.0314$<br>Lenti-GFP:Sham vs. Lenti-GFP:Stroke, $p=0.1556$<br>Lenti-GFP:Sham vs. Lenti-IRF5:Sham, $p=0.7968$<br>Lenti-GFP:Sham vs. Lenti-IRF5:Stroke, $p=0.0038$<br>Lenti-GFP:Stroke vs. Lenti-IRF5:Sham, $p=0.8389$<br>Lenti-GFP:Stroke vs. Lenti-IRF5:Stroke, $p=0.5572$<br>Lenti-IRF5:Sham vs. Lenti-IRF5:Stroke, $p=0.0903$ |
| 7C | 4 mice (Sham Lenti-IRF4)<br>4 mice (Sham Lenti-GFP)<br>4 mice (Sham Lenti-IRF5)<br>7 mice (Stroke Lenti-IRF4)<br>5 mice (Stroke Lenti-GFP)<br>6 mice (Stroke Lenti-IRF5) | Non-normal distribution | Ordinary TWO-way ANOVA; Tukey multiple post hoc | Interaction:<br>$F_{(1,24)}=1.939$ , $p=0.1649$<br><br>Row (Lenti-GFP vs Lenti-IRF5 vs Lenti-IRF4) factor:<br>$F_{(1,24)}=8.959$ , $p=0.0012$<br><br>Column (Sham vs Stroke) Factor:<br>$F_{(1,24)}=40.49$ , $p<0.0001$ | Lenti-IRF4:Sham vs. Lenti-IRF4:Stroke, $p=0.0007$<br>Lenti-IRF4:Sham vs. Lenti-GFP:Sham, $p=0.9997$<br>Lenti-IRF4:Sham vs. Lenti-GFP:Stroke, $p=0.0123$<br>Lenti-IRF4:Sham vs. Lenti-IRF5:Sham, $p=0.7527$<br>Lenti-IRF4:Sham vs. Lenti-IRF5:Stroke, $p=0.9858$<br>Lenti-IRF4:Stroke vs. Lenti-GFP:Sham, $p=0.0003$<br>Lenti-IRF4:Stroke vs. Lenti-GFP:Stroke, $p=0.9341$<br>Lenti-IRF4:Stroke vs. Lenti-IRF5:Sham, $p<0.0001$<br>Lenti-IRF4:Stroke vs. Lenti-IRF5:Stroke, $p=0.0006$<br>Lenti-GFP:Sham vs. Lenti-GFP:Stroke, $p=0.1556$<br>Lenti-GFP:Sham vs. Lenti-IRF5:Sham, $p=0.8917$<br>Lenti-GFP:Sham vs. Lenti-IRF5:Stroke, $p=0.9202$<br>Lenti-GFP:Stroke vs. Lenti-IRF5:Sham, $p=0.0004$                                                                                                            |

|    |                                                                                                                                                                          |                         |                                                 |                                                                                                                                                                                                                   |                                                                                                                                                                                                                                                                                                                                                                                                                                                                                                                                                                                                                                                                                                                                                                                 |
|----|--------------------------------------------------------------------------------------------------------------------------------------------------------------------------|-------------------------|-------------------------------------------------|-------------------------------------------------------------------------------------------------------------------------------------------------------------------------------------------------------------------|---------------------------------------------------------------------------------------------------------------------------------------------------------------------------------------------------------------------------------------------------------------------------------------------------------------------------------------------------------------------------------------------------------------------------------------------------------------------------------------------------------------------------------------------------------------------------------------------------------------------------------------------------------------------------------------------------------------------------------------------------------------------------------|
|    |                                                                                                                                                                          |                         |                                                 |                                                                                                                                                                                                                   | Lenti-GFP:Stroke vs. Lenti-IRF5:Stroke, p=0.0178<br>Lenti-IRF5:Sham vs. Lenti-IRF5:Stroke, p=0.2830                                                                                                                                                                                                                                                                                                                                                                                                                                                                                                                                                                                                                                                                             |
| 7E | 4 mice (Sham Lenti-IRF4)<br>3 mice (Sham Lenti-GFP)<br>4 mice (Sham Lenti-IRF5)<br>7 mice (Stroke Lenti-IRF4)<br>5 mice (Stroke Lenti-GFP)<br>6 mice (Stroke Lenti-IRF5) | Non-normal distribution | Ordinary TWO-way ANOVA; Tukey multiple post hoc | Interaction:<br>$F_{(1,21)}=1.347$ , p=0.2815<br><br>Row (Lenti-GFP vs Lenti-IRF5 vs Lenti-IRF4) factor:<br>$F_{(1,21)}=2.575$ , p=0.1000<br><br>Column (Sham vs Stroke) Factor:<br>$F_{(1,21)}=9.732$ , p=0.0052 | Lenti-IRF4:Sham vs. Lenti-IRF4:Stroke, p=0.9417<br>Lenti-IRF4:Sham vs. Lenti-GFP:Sham, p=0.9913<br>Lenti-IRF4:Sham vs. Lenti-GFP:Stroke, p=0.9732<br>Lenti-IRF4:Sham vs. Lenti-IRF5:Sham, p>0.9999<br>Lenti-IRF4:Sham vs. Lenti-IRF5:Stroke, p=0.0472<br>Lenti-IRF4:Stroke vs. Lenti-GFP:Sham, p=0.6147<br>Lenti-IRF4:Stroke vs. Lenti-GFP:Stroke, p>0.9999<br>Lenti-IRF4:Stroke vs. Lenti-IRF5:Sham, p<0.9557<br>Lenti-IRF4:Stroke vs. Lenti-IRF5:Stroke, p=0.0807<br>Lenti-GFP:Sham vs. Lenti-GFP:Stroke, p=0.0328<br>Lenti-GFP:Sham vs. Lenti-IRF5:Sham, p=0.9874<br>Lenti-GFP:Sham vs. Lenti-IRF5:Stroke, p=0.0110<br>Lenti-GFP:Stroke vs. Lenti-IRF5:Sham, p=0.9809<br>Lenti-GFP:Stroke vs. Lenti-IRF5:Stroke, p=0.0399<br>Lenti-IRF5:Sham vs. Lenti-IRF5:Stroke, p=0.0232 |
| 7F | 3 mice (Sham Lenti-IRF4)<br>3 mice (Sham Lenti-GFP)<br>3 mice (Sham Lenti-IRF5)<br>6 mice (Stroke Lenti-IRF4)<br>5 mice (Stroke Lenti-GFP)<br>6 mice (Stroke Lenti-IRF5) | Non-normal distribution | Ordinary TWO-way ANOVA; Tukey multiple post hoc | Interaction:<br>$F_{(1,22)}=7.584$ , p=0.0031<br><br>Row (Lenti-GFP vs Lenti-IRF5 vs Lenti-IRF4) factor:<br>$F_{(1,22)}=7.725$ , p=0.0029<br><br>Column (Sham vs Stroke) Factor:<br>$F_{(1,22)}=101.1$ , p<0.0001 | Lenti-IRF4:Sham vs. Lenti-IRF4:Stroke, p=0.0137<br>Lenti-IRF4:Sham vs. Lenti-GFP:Sham, p>0.9999<br>Lenti-IRF4:Sham vs. Lenti-GFP:Stroke, p=0.0005<br>Lenti-IRF4:Sham vs. Lenti-IRF5:Sham, p>0.9999<br>Lenti-IRF4:Sham vs. Lenti-IRF5:Stroke, p<0.0001<br>Lenti-IRF4:Stroke vs. Lenti-GFP:Sham, p=0.0265<br>Lenti-IRF4:Stroke vs. Lenti-GFP:Stroke, p=0.5232<br>Lenti-IRF4:Stroke vs. Lenti-IRF5:Sham, p=0.0143<br>Lenti-IRF4:Stroke vs. Lenti-IRF5:Stroke, p<0.0001<br>Lenti-GFP:Sham vs. Lenti-GFP:Stroke, p=0.0011<br>Lenti-GFP:Sham vs. Lenti-IRF5:Sham, p>0.9999<br>Lenti-GFP:Sham vs. Lenti-IRF5:Stroke, p<0.0001<br>Lenti-GFP:Stroke vs. Lenti-IRF5:Sham, p=0.0005                                                                                                        |

|    |                                                                                                                                                                          |                         |                                                 |                                                                                                                                                                                                                   |                                                                                                                                                                                                                                                                                                                                                                                                                                                                                                                                                                                                                                                                                                                                                                                 |
|----|--------------------------------------------------------------------------------------------------------------------------------------------------------------------------|-------------------------|-------------------------------------------------|-------------------------------------------------------------------------------------------------------------------------------------------------------------------------------------------------------------------|---------------------------------------------------------------------------------------------------------------------------------------------------------------------------------------------------------------------------------------------------------------------------------------------------------------------------------------------------------------------------------------------------------------------------------------------------------------------------------------------------------------------------------------------------------------------------------------------------------------------------------------------------------------------------------------------------------------------------------------------------------------------------------|
|    |                                                                                                                                                                          |                         |                                                 |                                                                                                                                                                                                                   | Lenti-GFP:Stroke vs. Lenti-IRF5:Stroke, p=0.0068<br>Lenti-IRF5:Sham vs. Lenti-IRF5:Stroke, p<0.0001                                                                                                                                                                                                                                                                                                                                                                                                                                                                                                                                                                                                                                                                             |
| 7G | 3 mice (Sham Lenti-IRF4)<br>3 mice (Sham Lenti-GFP)<br>3 mice (Sham Lenti-IRF5)<br>6 mice (Stroke Lenti-IRF4)<br>5 mice (Stroke Lenti-GFP)<br>6 mice (Stroke Lenti-IRF5) | Non-normal distribution | Ordinary TWO-way ANOVA; Tukey multiple post hoc | Interaction:<br>$F_{(1,22)}=4.349$ , p=0.0230<br><br>Row (Lenti-GFP vs Lenti-IRF5 vs Lenti-IRF4) factor:<br>$F_{(1,22)}=4.467$ , p=0.0211<br><br>Column (Sham vs Stroke) Factor:<br>$F_{(1,22)}=50.54$ , p<0.0001 | Lenti-IRF4:Sham vs. Lenti-IRF4:Stroke, p=0.0124<br>Lenti-IRF4:Sham vs. Lenti-GFP:Sham, p>0.9999<br>Lenti-IRF4:Sham vs. Lenti-GFP:Stroke, p=0.0259<br>Lenti-IRF4:Sham vs. Lenti-IRF5:Sham, p>0.9999<br>Lenti-IRF4:Sham vs. Lenti-IRF5:Stroke, p<0.0001<br>Lenti-IRF4:Stroke vs. Lenti-GFP:Sham, p=0.1664<br>Lenti-IRF4:Stroke vs. Lenti-GFP:Stroke, p=0.9173<br>Lenti-IRF4:Stroke vs. Lenti-IRF5:Sham, p=0.1290<br>Lenti-IRF4:Stroke vs. Lenti-IRF5:Stroke, p<0.0017<br>Lenti-GFP:Sham vs. Lenti-GFP:Stroke, p=0.0387<br>Lenti-GFP:Sham vs. Lenti-IRF5:Sham, p>0.9999<br>Lenti-GFP:Sham vs. Lenti-IRF5:Stroke, p<0.0001<br>Lenti-GFP:Stroke vs. Lenti-IRF5:Sham, p=0.0271<br>Lenti-GFP:Stroke vs. Lenti-IRF5:Stroke, p=0.0498<br>Lenti-IRF5:Sham vs. Lenti-IRF5:Stroke, p<0.0001 |
| 7H | 3 mice (Sham Lenti-IRF4)<br>3 mice (Sham Lenti-GFP)<br>3 mice (Sham Lenti-IRF5)<br>6 mice (Stroke Lenti-IRF4)<br>5 mice (Stroke Lenti-GFP)<br>6 mice (Stroke Lenti-IRF5) | Non-normal distribution | Ordinary TWO-way ANOVA; Tukey multiple post hoc | Interaction:<br>$F_{(1,22)}=8.035$ , p=0.0019<br><br>Row (Lenti-GFP vs Lenti-IRF5 vs Lenti-IRF4) factor:<br>$F_{(1,22)}=7.992$ , p=0.020<br><br>Column (Sham vs Stroke) Factor:<br>$F_{(1,22)}=50.54$ , p<0.0001  | Lenti-IRF4:Sham vs. Lenti-IRF4:Stroke, p=0.0005<br>Lenti-IRF4:Sham vs. Lenti-GFP:Sham, p>0.9999<br>Lenti-IRF4:Sham vs. Lenti-GFP:Stroke, p<0.0001<br>Lenti-IRF4:Sham vs. Lenti-IRF5:Sham, p>0.9999<br>Lenti-IRF4:Sham vs. Lenti-IRF5:Stroke, p<0.0001<br>Lenti-IRF4:Stroke vs. Lenti-GFP:Sham, p=0.0018<br>Lenti-IRF4:Stroke vs. Lenti-GFP:Stroke, p=0.3391<br>Lenti-IRF4:Stroke vs. Lenti-IRF5:Sham, p=0.0008<br>Lenti-IRF4:Stroke vs. Lenti-IRF5:Stroke, p<0.0001<br>Lenti-GFP:Sham vs. Lenti-GFP:Stroke, p<0.0001<br>Lenti-GFP:Sham vs. Lenti-IRF5:Sham, p>0.9999<br>Lenti-GFP:Sham vs. Lenti-IRF5:Stroke, p<0.0001<br>Lenti-GFP:Stroke vs. Lenti-IRF5:Sham, p<0.0001<br>Lenti-GFP:Stroke vs. Lenti-IRF5:Stroke, p=0.0216                                                    |

|    |                                                                                                                                                                          |                         |                                                 |                                                                                                                                                                                                                                                                                                                                               |                                                                                                                                                                                                                                                                                                                                                                                                                                                                                                                                                                                                                                                                                                                                                                                                                                       |
|----|--------------------------------------------------------------------------------------------------------------------------------------------------------------------------|-------------------------|-------------------------------------------------|-----------------------------------------------------------------------------------------------------------------------------------------------------------------------------------------------------------------------------------------------------------------------------------------------------------------------------------------------|---------------------------------------------------------------------------------------------------------------------------------------------------------------------------------------------------------------------------------------------------------------------------------------------------------------------------------------------------------------------------------------------------------------------------------------------------------------------------------------------------------------------------------------------------------------------------------------------------------------------------------------------------------------------------------------------------------------------------------------------------------------------------------------------------------------------------------------|
|    |                                                                                                                                                                          |                         |                                                 |                                                                                                                                                                                                                                                                                                                                               | Lenti-IRF5:Sham vs. Lenti-IRF5:Stroke, $p < 0.0001$                                                                                                                                                                                                                                                                                                                                                                                                                                                                                                                                                                                                                                                                                                                                                                                   |
| 8B | 6 mice (Stroke Lenti-IRF4)<br>6 mice (Stroke Lenti-GFP)<br>5 mice (Stroke Lenti-IRF5)                                                                                    | Non-normal distribution | t test (two-tailed)                             | $t_{(11)}=2.234$ (Lenti-IRF4 vs Lenti-GFP, Cortex)<br>$t_{(11)}=0.4118$ (Lenti-IRF4 vs Lenti-GFP, Striatum)<br>$t_{(11)}=1.505$ (Lenti-IRF4 vs Lenti-GFP, Hemisphere)<br>$t_{(11)}=4.028$ (Lenti-IRF5 vs Lenti-GFP, Cortex)<br>$t_{(11)}=1.028$ (Lenti-IRF5 vs Lenti-GFP, Striatum)<br>$t_{(11)}=4.427$ (Lenti-IRF5 vs Lenti-GFP, Hemisphere) | Lenti-IRF4 vs Lenti-GFP, $p=0.0472$ (Cortex)<br>Lenti-IRF4 vs Lenti-GFP, $p=0.6884$ (Striatum)<br>Lenti-IRF4 vs Lenti-GFP, $p=0.1604$ (Hemisphere)<br>Lenti-IRF5 vs Lenti-GFP, $p=0.0770$ (Cortex)<br>Lenti-IRF5 vs Lenti-GFP, $p=0.0919$ (Striatum)<br>Lenti-IRF5 vs Lenti-GFP, $p=0.0017$ (Hemisphere)                                                                                                                                                                                                                                                                                                                                                                                                                                                                                                                              |
| 8C | 4 mice (Sham Lenti-IRF4)<br>3 mice (Sham Lenti-GFP)<br>4 mice (Sham Lenti-IRF5)<br>7 mice (Stroke Lenti-IRF4)<br>6 mice (Stroke Lenti-GFP)<br>6 mice (Stroke Lenti-IRF5) | Non-normal distribution | Ordinary TWO-way ANOVA; Tukey multiple post hoc | Interaction:<br>$F_{(1,23)}=2.990$ , $p=0.0678$<br><br>Row (Sham vs Stroke) factor: $F_{(1,23)}=172.6$ , $p < 0.0001$<br><br>Column (Lenti-GFP vs Lenti-IRF5 vs Lenti-IRF4) Factor: $F_{(1,23)}=2.990$ , $p=0.0678$                                                                                                                           | Sham:Lenti-GFP vs. Sham:Lenti-IRF4, $p > 0.9999$<br>Sham:Lenti-GFP vs. Sham:Lenti-IRF5, $p > 0.9999$<br>Sham:Lenti-GFP vs. Stroke:Lenti-GFP, $p < 0.0001$<br>Sham:Lenti-GFP vs. Stroke:Lenti-IRF4, $p < 0.0001$<br>Sham:Lenti-GFP vs. Stroke:Lenti-IRF5, $p < 0.0001$<br>Sham:Lenti-IRF4 vs. Sham:Lenti-IRF5, $p > 0.9999$<br>Sham:Lenti-IRF4 vs. Stroke:Lenti-GFP, $p < 0.0001$<br>Sham:Lenti-IRF4 vs. Stroke:Lenti-IRF4, $p < 0.0001$<br>Sham:Lenti-IRF4 vs. Stroke:Lenti-IRF5, $p < 0.0001$<br>Sham:Lenti-IRF5 vs. Stroke:Lenti-GFP, $p < 0.0001$<br>Sham:Lenti-IRF5 vs. Stroke:Lenti-IRF4, $p < 0.0001$<br>Sham:Lenti-IRF5 vs. Stroke:Lenti-IRF5, $p < 0.0001$<br>Stroke:Lenti-GFP vs. Stroke:Lenti-IRF4, $p=0.8501$<br>Stroke:Lenti-GFP vs. Stroke:Lenti-IRF5, $p=0.0225$<br>Stroke:Lenti-IRF4 vs. Stroke:Lenti-IRF5, $p=0.0062$ |
| 8D | 4 mice (Sham Lenti-IRF4)<br>3 mice (Sham Lenti-GFP)<br>3 mice (Sham Lenti-IRF5)<br>7 mice (Stroke Lenti-IRF4)<br>5 mice (Stroke Lenti-GFP)<br>6 mice (Stroke Lenti-IRF5) | Non-normal distribution | Ordinary TWO-way ANOVA; Tukey multiple post hoc | Interaction:<br>$F_{(1,23)}=4.225$ , $p=0.0274$<br><br>Row (Sham vs Stroke) factor: $F_{(1,23)}=28.88$ , $p < 0.0001$<br><br>Column (Lenti-GFP vs Lenti-IRF5 vs Lenti-IRF4) Factor: $F_{(1,23)}=0.944$ , $p=0.4036$                                                                                                                           | Sham:Lenti-GFP vs. Sham:Lenti-IRF4, $p > 0.9999$<br>Sham:Lenti-GFP vs. Sham:Lenti-IRF5, $p=0.9425$<br>Sham:Lenti-GFP vs. Stroke:Lenti-GFP, $p=0.4741$<br>Sham:Lenti-GFP vs. Stroke:Lenti-IRF4, $p=0.3072$<br>Sham:Lenti-GFP vs. Stroke:Lenti-IRF5, $p=0.0012$<br>Sham:Lenti-IRF4 vs. Sham:Lenti-IRF5, $p=0.9772$                                                                                                                                                                                                                                                                                                                                                                                                                                                                                                                      |

|     |                                                                                                                                                                          |                         |                                                             |                                                                                                                                                                                                                            |                                                                                                                                                                                                                                                                                                                                                                                                                                                                                                                                                                                                                                                                                                                                                                                                                                                                                    |
|-----|--------------------------------------------------------------------------------------------------------------------------------------------------------------------------|-------------------------|-------------------------------------------------------------|----------------------------------------------------------------------------------------------------------------------------------------------------------------------------------------------------------------------------|------------------------------------------------------------------------------------------------------------------------------------------------------------------------------------------------------------------------------------------------------------------------------------------------------------------------------------------------------------------------------------------------------------------------------------------------------------------------------------------------------------------------------------------------------------------------------------------------------------------------------------------------------------------------------------------------------------------------------------------------------------------------------------------------------------------------------------------------------------------------------------|
|     |                                                                                                                                                                          |                         |                                                             |                                                                                                                                                                                                                            | Sham:Lenti-IRF4 vs.<br>Stroke:Lenti-GFP, p=0.4913<br>Sham:Lenti-IRF4 vs.<br>Stroke:Lenti-IRF4, p=0.3297<br>Sham:Lenti-IRF4 vs.<br>Stroke:Lenti-IRF5, p=0.0023<br>Sham:Lenti-IRF5 vs.<br>Stroke:Lenti-GFP, p=0.1266<br>Sham:Lenti-IRF5 vs.<br>Stroke:Lenti-IRF4, p=0.0737<br>Sham:Lenti-IRF5 vs.<br>Stroke:Lenti-IRF5, p=0.0003<br>Stroke:Lenti-GFP vs.<br>Stroke:Lenti-IRF4, p=0.9979<br>Stroke:Lenti-GFP vs.<br>Stroke:Lenti-IRF5, p=0.0244<br>Stroke:Lenti-IRF4 vs.<br>Stroke:Lenti-IRF5, p=0.0776                                                                                                                                                                                                                                                                                                                                                                               |
| 8E  | 4 mice (Sham Lenti-IRF4)<br>3 mice (Sham Lenti-GFP)<br>4 mice (Sham Lenti-IRF5)<br>6 mice (Stroke Lenti-IRF4)<br>6 mice (Stroke Lenti-GFP)<br>6 mice (Stroke Lenti-IRF5) | Non-normal distribution | Ordinary<br>TWO-way<br>ANOVA;<br>Tukey multiple<br>post hoc | Interaction:<br>$F_{(1,23)}=1.276$ , p=0.2982<br><br>Row (Sham vs Stroke)<br>factor: $F_{(1,23)}=400.6$ ,<br>p<0.0001<br><br>Column (Lenti-GFP vs<br>Lenti-IRF5 vs Lenti-IRF4)<br>Factor:<br>$F_{(1,23)}=2.906$ , p=0.0750 | Sham:Lenti-GFP vs.<br>Sham:Lenti-IRF4, p=0.9999<br>Sham:Lenti-GFP vs.<br>Sham:Lenti-IRF5, p=0.9423<br>Sham:Lenti-GFP vs.<br>Stroke:Lenti-GFP, p<0.0001<br>Sham:Lenti-GFP vs.<br>Stroke:Lenti-IRF4, p<0.0001<br>Sham:Lenti-GFP vs.<br>Stroke:Lenti-IRF5, p<0.0001<br>Sham:Lenti-IRF4 vs.<br>Sham:Lenti-IRF5, p>0.9999<br>Sham:Lenti-IRF4 vs.<br>Stroke:Lenti-GFP, p<0.0001<br>Sham:Lenti-IRF4 vs.<br>Stroke:Lenti-IRF4, p<0.0001<br>Sham:Lenti-IRF4 vs.<br>Stroke:Lenti-IRF4, p<0.0001<br>Sham:Lenti-IRF4 vs.<br>Stroke:Lenti-IRF5, p<0.0001<br>Sham:Lenti-IRF5 vs.<br>Stroke:Lenti-GFP, p<0.0001<br>Sham:Lenti-IRF5 vs.<br>Stroke:Lenti-IRF4, p<0.0001<br>Sham:Lenti-IRF5 vs.<br>Stroke:Lenti-IRF5, p<0.0001<br>Stroke:Lenti-GFP vs.<br>Stroke:Lenti-IRF4, p=0.0672<br>Stroke:Lenti-GFP vs.<br>Stroke:Lenti-IRF5, p=0.0850<br>Stroke:Lenti-IRF4 vs.<br>Stroke:Lenti-IRF5, p=0.0871 |
| S1A | 5 mice (IRF5 fl/fl)<br>5 mice (IRF5 CKO)                                                                                                                                 | Non-normal distribution | t test (two-tailed)                                         | $t_{(7)}=2.557$                                                                                                                                                                                                            | fl/fl vs CKO, p=0.0377                                                                                                                                                                                                                                                                                                                                                                                                                                                                                                                                                                                                                                                                                                                                                                                                                                                             |
| S1B | 4 mice (IRF4 fl/fl)<br>5 mice (IRF4 CKO)                                                                                                                                 | Non-normal distribution | t test (two-tailed)                                         | $t_{(7)}=3.466$                                                                                                                                                                                                            | fl/fl vs CKO, p=0.0105                                                                                                                                                                                                                                                                                                                                                                                                                                                                                                                                                                                                                                                                                                                                                                                                                                                             |
| S3A | 6 mice (IRF5 fl/fl)<br>6 mice (IRF5 CKO)                                                                                                                                 | Non-normal distribution | t test (two-tailed)                                         | $t_{(10)}=0.341$                                                                                                                                                                                                           | fl/fl vs CKO, p=0.7402                                                                                                                                                                                                                                                                                                                                                                                                                                                                                                                                                                                                                                                                                                                                                                                                                                                             |
| S3B | 6 mice (IRF5 fl/fl)<br>6 mice (IRF5 CKO)                                                                                                                                 | Non-normal distribution | t test (two-tailed)                                         | $t_{(10)}=0.514$                                                                                                                                                                                                           | fl/fl vs CKO, p=0.6180                                                                                                                                                                                                                                                                                                                                                                                                                                                                                                                                                                                                                                                                                                                                                                                                                                                             |
| S3C | 6 mice (IRF4 fl/fl)<br>6 mice (IRF4 CKO)                                                                                                                                 | Non-normal distribution | t test (two-tailed)                                         | $t_{(10)}=0.619$                                                                                                                                                                                                           | fl/fl vs CKO, p=0.5496                                                                                                                                                                                                                                                                                                                                                                                                                                                                                                                                                                                                                                                                                                                                                                                                                                                             |
| S3D | 6 mice (IRF4 fl/fl)<br>6 mice (IRF4 CKO)                                                                                                                                 | Non-normal distribution | t test (two-tailed)                                         | $t_{(10)}=1.296$                                                                                                                                                                                                           | fl/fl vs CKO, p=0.2360                                                                                                                                                                                                                                                                                                                                                                                                                                                                                                                                                                                                                                                                                                                                                                                                                                                             |
| S4C | 4 mice (Sham IRF5 fl/fl)                                                                                                                                                 | Non-normal distribution | Ordinary TWO-way                                            | Interaction:<br>$F_{(1,16)}=0.118$ , p=0.7357                                                                                                                                                                              | Sham:IRF5 fl/fl vs. Sham:IRF5 CKO, p>0.9999                                                                                                                                                                                                                                                                                                                                                                                                                                                                                                                                                                                                                                                                                                                                                                                                                                        |

|     |                                                                                                              |                         |                                                    |                                                                                                                                                                                                   |                                                                                                                                                                                                                                                                                                                |
|-----|--------------------------------------------------------------------------------------------------------------|-------------------------|----------------------------------------------------|---------------------------------------------------------------------------------------------------------------------------------------------------------------------------------------------------|----------------------------------------------------------------------------------------------------------------------------------------------------------------------------------------------------------------------------------------------------------------------------------------------------------------|
|     | 4 mice (Sham IRF5 CKO)<br>6 mice (Stroke IRF5 fl/fl)<br>6 mice (Stroke IRF5 CKO)                             |                         | ANOVA;<br>Tukey multiple post hoc                  | Row (Sham vs Stroke) factor: $F_{(1,16)}=22.37$ , $p=0.0002$<br><br>Column (IRF4 fl/fl vs IRF4 CKO) Factor: $F_{(1,16)}=0.1252$ , $p=0.7281$                                                      | Sham:IRF5 fl/fl vs. Stroke:IRF5 fl/fl, $p=0.0311$<br>Sham:IRF5 fl/fl vs. Stroke:IRF5 CKO, $p=0.0117$<br>Sham:IRF5 CKO vs. Stroke:IRF5 fl/fl, $p=0.0318$<br>Sham:IRF5 CKO vs. Stroke:IRF5 CKO, $p=0.0119$<br>Stroke:IRF5 fl/fl vs. Stroke:IRF5 CKO, $p=0.9449$                                                  |
| S4D | 4 mice (Sham IRF5 fl/fl)<br>4 mice (Sham IRF5 CKO)<br>6 mice (Stroke IRF5 fl/fl)<br>6 mice (Stroke IRF5 CKO) | Non-normal distribution | Ordinary TWO-way ANOVA;<br>Tukey multiple post hoc | Interaction: $F_{(1,16)}=1.257$ , $p=0.2787$<br><br>Row (Sham vs Stroke) factor: $F_{(1,16)}=60.94$ , $p<0.0001$<br><br>Column (IRF4 fl/fl vs IRF4 CKO) Factor: $F_{(1,16)}=1.342$ , $p=0.2637$   | Sham:IRF5 fl/fl vs. Sham:IRF5 CKO, $p>0.9999$<br>Sham:IRF5 fl/fl vs. Stroke:IRF5 fl/fl, $p=0.0012$<br>Sham:IRF5 fl/fl vs. Stroke:IRF5 CKO, $p<0.0001$<br>Sham:IRF5 CKO vs. Stroke:IRF5 fl/fl, $p=0.0012$<br>Sham:IRF5 CKO vs. Stroke:IRF5 CKO, $p<0.0001$<br>Stroke:IRF5 fl/fl vs. Stroke:IRF5 CKO, $p=0.3081$ |
| S4E | 4 mice (Sham IRF5 fl/fl)<br>4 mice (Sham IRF5 CKO)<br>6 mice (Stroke IRF5 fl/fl)<br>6 mice (Stroke IRF5 CKO) | Non-normal distribution | Ordinary TWO-way ANOVA;<br>Tukey multiple post hoc | Interaction: $F_{(1,16)}=0.8161$ , $p=0.3797$<br><br>Row (Sham vs Stroke) factor: $F_{(1,16)}=21.73$ , $p=0.0003$<br><br>Column (IRF4 fl/fl vs IRF4 CKO) Factor: $F_{(1,16)}=0.8421$ , $p=0.3724$ | Sham:IRF5 fl/fl vs. Sham:IRF5 CKO, $p>0.9999$<br>Sham:IRF5 fl/fl vs. Stroke:IRF5 fl/fl, $p=0.0735$<br>Sham:IRF5 fl/fl vs. Stroke:IRF5 CKO, $p=0.0057$<br>Sham:IRF5 CKO vs. Stroke:IRF5 fl/fl, $p=0.0749$<br>Sham:IRF5 CKO vs. Stroke:IRF5 CKO, $p=0.0058$<br>Stroke:IRF5 fl/fl vs. Stroke:IRF5 CKO, $p=0.4943$ |
| S4F | 4 mice (Sham IRF5 fl/fl)<br>4 mice (Sham IRF5 CKO)<br>6 mice (Stroke IRF5 fl/fl)<br>6 mice (Stroke IRF5 CKO) | Non-normal distribution | Ordinary TWO-way ANOVA;<br>Tukey multiple post hoc | Interaction: $F_{(1,16)}=0.3946$ , $p=0.5388$<br><br>Row (Sham vs Stroke) factor: $F_{(1,16)}=85.81$ , $p<0.0001$<br><br>Column (IRF4 fl/fl vs IRF4 CKO) Factor: $F_{(1,16)}=0.215$ , $p=0.6491$  | Sham:IRF5 fl/fl vs. Sham:IRF5 CKO, $p=0.9996$<br>Sham:IRF5 fl/fl vs. Stroke:IRF5 fl/fl, $p<0.0001$<br>Sham:IRF5 fl/fl vs. Stroke:IRF5 CKO, $p<0.0001$<br>Sham:IRF5 CKO vs. Stroke:IRF5 fl/fl, $p<0.0001$<br>Sham:IRF5 CKO vs. Stroke:IRF5 CKO, $p<0.0001$<br>Stroke:IRF5 fl/fl vs. Stroke:IRF5 CKO, $p=0.8235$ |
| S5B | 5 mice (Lenti-GFP)<br>5 mice (Lenti-IRF4)                                                                    | Non-normal distribution | t test (two-tailed)                                | $t_{(8)}=5.209$                                                                                                                                                                                   | Lenti-GFP vs Lenti-IRF4, $p=0.0008$                                                                                                                                                                                                                                                                            |
| S5C | 5 mice (Lenti-GFP)<br>5 mice (Lenti-IRF4)                                                                    | Non-normal distribution | t test (two-tailed)                                | $t_{(8)}=5.558$                                                                                                                                                                                   | Lenti-GFP vs Lenti-IRF5, $p=0.0004$                                                                                                                                                                                                                                                                            |
